# Supplementary material for: Enrichment of calcium in sea spray aerosol through bulk measurements and individual particle analysis during the R/V Xuelong cruise over the Ross Sea, Antarctica
Source: Copernicus journal article supplement (doi:10.5194/egusphere-2023-322), 2023-03-24
Supplement: Supplementary file 1 [file egusphere-2023-322-supplement.pdf]

1 *Supplement for*  
2 **Enrichment of calcium in sea spray aerosol through bulk measurements and**  
3 **individual particle analysis during the R/V *Xuelong* cruise over the Ross Sea,**  
4 **Antarctica**

5

6 **By Su et al.**

7

8 Correspondence to: Guo-hua Zhang ([zhanggh@gig.ac.cn](mailto:zhanggh@gig.ac.cn)) and Lei Li ([lileishdx@163.com](mailto:lileishdx@163.com)).

9 **Table of contents**

10 1. Supplementary Text S1 to S8

11 Text S1. Water-soluble ion mass concentration and hygroscopicity of OC-Ca

12 Text S2. A brief description of the in-situ Gas and Aerosol Compositions monitoring system  
13 and the single-particle aerosol mass spectrometer

14 Text S3. Uncertainty analysis and quality assurance of datasets

15 Text S4. Single-particle characteristics of other observed particle types

16 Text S5. Potassium and magnesium enrichment in SSAs induced by temperature, wind speed,  
17 and sea ice

18 Text S6. Further correlation analysis between mass concentration of  $\text{Ca}^{2+}$ , single-particle type  
19 of OC-Ca, and single-particle type of SS

20 Text S7. Multiple linear and random forest regression

21 Text S8. A comparative analysis of chemical composition, particle size and counts, and mixing  
22 state via SPAMS between the leg I and leg II

23 2. Supplementary Figures (Figure S1 to S22)

24 3. Supplementary Tables (Table S1 to S5)

25 **Note:** Figures S13-S22 were used when discussing supplementary Text (S3, S5, S7, and S8) and  
26 were not cited in the main-text.

27 **Introduction:** This supplement contains additional information on the comparative analysis.

28 **Text S1. Water-soluble ion mass concentration and hygroscopicity of OC-Ca**

29 In this study, we concluded that the OC-Ca partly accounts for the calcium enrichment over  
30 the Ross Sea, Antarctica, by combining the IGAC and SPAMS datasets.

31 In terms of IGAC datasets, it should be clarified that the water-soluble ion mass concentration  
32 included the pure inorganic part (e.g., pure sea salt, NaCl) and mixed organic-inorganic part (e.g.,  
33 gel-like particles) (Quinn et al., 2015). Numerous studies have reported that primary sea spray  
34 aerosols (SSAs) exhibit moderate hygroscopicity and water solubility due to a certain water-soluble  
35 organic fraction (~ 25%, by mass), such as carboxylates, lipopolysaccharides (LPSs), humic  
36 substances, and galactose (Oppo et al., 1999; Quinn et al., 2015; Schill et al., 2015; Cochran et al.,  
37 2017). In particular, LPSs, which are preferentially transferred to submicron SSAs during bubble  
38 bursting, exhibit a certain solubility of 5 g L<sup>-1</sup> in pure water. (Facchini et al., 2008; Schill et al.,  
39 2015). Oppo et al. (1999) indicated that humic substances are also an important pool of water-  
40 soluble natural surfactants (40-60%) in marine surfactant organic matter. Therefore, both organic  
41 and inorganic parts with a water-soluble nature could be retained, contributing to the water-soluble  
42 ion mass concentration (e.g., Ca<sup>2+</sup>).

43 In terms of SPAMS datasets, we inferred that the OC-Ca is of biogenic origin and may be  
44 associated with marine microgels (i.e., gel-like particles). If so, these gel-like particles are most  
45 likely water-insoluble and/or slightly water-soluble (Leck and Bigg, 2010; Orellana et al., 2011).  
46 Under the stimulation of environment factors (pH, temperature, chemical compounds, pollutants,  
47 and UV radiation), their physicochemical properties would be changed (e.g., the cleavage of  
48 polymers results in enhanced water-solubility) (Orellana and Verdugo, 2003; Orellana et al., 2011).  
49 Although we did not measure the hygroscopicity of the OC-Ca particle type in this study, we

50 considered the OC-Ca to be hygroscopic to some extent, based on the results of Cochran et al. (2017).  
51 Those authors concluded that the mixture of sea salt with organic matter (i.e., the single-particle  
52 types of SS-OC and OC) can also exhibit a certain hygroscopicity (hygroscopicity parameter, 0.50-  
53 1.27).

54 **Text S2. A brief description of the in-situ Gas and Aerosol Compositions monitoring system**  
55 **and the single-particle aerosol mass spectrometer**

56 The aerosol water-soluble ion mass concentrations with an aerodynamic diameter of 10  $\mu\text{m}$   
57 were provided by an in-situ Gas and Aerosol Compositions monitoring system. The detailed  
58 analytical discipline and methodology were described in previous studies (Yan et al., 2019; Yan et  
59 al., 2020b). Briefly, the IGAC system consisted of three main units, including a Wet Annular  
60 Denuder (WAD), a Scrub and Impact Aerosol Collector (SIAC), and an ion chromatograph (IC,  
61 Dionex ICS-3000). Gases and aerosols were passed through WAD with a sampling flow of 16.7 L  
62  $\text{min}^{-1}$ . Two concentric Pyrex glass cylinders with a length of 50 cm and inner and outer diameters  
63 of 1.8 and 2.44 cm were assembled to WAD, in which the inner walls of the annulus were wetted  
64 with ultrapure water ( $18.2 \text{ M}\Omega \text{ cm}^{-1}$ ). This part was responsible for the collection of acidic and basic  
65 gases by diffusion and absorption of downward flowing aqueous solution. The SIAC had a length  
66 of 23 cm and diameter of 4.75 cm, which was positioned at an angle to facilitate the collection of  
67 enlarged particles. The collected particles were separated firstly, continually enlarged by vapor  
68 steam, and then accelerated through a conical-shaped impaction nozzle and collected on an  
69 impaction plate. Each aerosol sample was collected for 55 minutes and injected for 5 minutes. The  
70 particles were subsequently analyzed for cations and anions by using an ion chromatography (IC)

71 system (Dionex ICS-3000). The injection loop size was 500  $\mu\text{L}$  for both anions and cations. The  
72 target ion concentrations were calibrated with a coefficient of determination ( $r^2$ ) above 0.99 by using  
73 standard solutions (0.1-2000  $\mu\text{g L}^{-1}$ ). The detection limits for Na, Cl, Ca, K, and Mg were 0.03, 0.03,  
74 0.019, 0.011, and 0.042  $\mu\text{g L}^{-1}$  (aqueous solution), respectively. The systematic error of the IC  
75 systems was generally less than 5%.

76 Single-particle mass spectral fingerprints and vacuum aerodynamic diameter ( $D_{va}$ ) lengths  
77 ranging from 0.2 to 2  $\mu\text{m}$  were provided by SPAMS (Li et al., 2011). Briefly, the aerosols were  
78 drawn into an aerodynamic lens, forming a collimated particle beam and were then accelerated in  
79 an accelerating electric field and passed through two continuous laser beams (Nd: YAG laser, 532  
80 nm). The obtained time of flight (TOF) and velocity of individual particles were used to calculate  
81 the  $D_{va}$  based on a calibration curve. Subsequently, particles with a specific velocity were desorbed  
82 and ionized by triggering a pulse laser (an Nd: YAG laser, 266 nm,  $0.6 \pm 0.06$  mJ was used in this  
83 study). The ion fragments were recorded using a TOF mass spectrometer. Prior to the use of SPAMS,  
84 standard polystyrene latex spheres (Duke Scientific Corp., Palo Alto, CA) and  $\text{PbCl}_2$  and  $\text{NaNO}_3$   
85 (Sigma-Aldrich) were used for the size and mass spectral calibration, respectively.

### 86 **Text S3. Uncertainty analysis and quality assurance of datasets**

87 **IGAC:** The water-soluble ion mass concentrations were analyzed by using an ion  
88 chromatography (IC) system (Dionex ICS-3000) within an in-situ Gas and Aerosol Compositions  
89 monitoring system (IGAC, Model S-611). Before the sampling, a known concentration of LiBr was  
90 used as an internal standard by adding to the aerosol liquid samples to determine the stability of the  
91 IGAC system. The changes in the internal standard were within 5%. Subsequently, the IC was

92 calibrated by using six to eight concentrations of stand solutions (0.1-2000  $\mu\text{g L}^{-1}$ ), depending on  
 93 the target species and concentrations, in which the  $R^2$  was above 0.99. The calibration curves for  
 94 each ion could be found in our previous studies (Yan et al., 2019; Yan et al., 2020a; Yan et al., 2020b).  
 95 The uncertainty of the IC systems was generally less than 5% for all analyzed ionic species. The  
 96 detection limits for  $\text{Na}^+$ ,  $\text{Cl}^-$ ,  $\text{Ca}^{2+}$ ,  $\text{K}^+$ , and  $\text{Mg}^{2+}$  were 0.03, 0.03, 0.019, 0.011, and 0.042  $\mu\text{g L}^{-1}$   
 97 (aqueous solution), respectively. During the whole sampling period (hourly temporal resolution),  
 98 the detection rate for  $\text{Na}^+$ ,  $\text{Cl}^-$ ,  $\text{Ca}^{2+}$ ,  $\text{K}^+$ , and  $\text{Mg}^{2+}$  were 98.5% (1178 of 1196), 92.6% (1108 of  
 99 1196), 88.2% (1055 of 1196), 98.9% (1183 of 1196), and 98.5% (1178 of 1196), respectively. All  
 100 values below the detection limit were omitted before analysis. The undetected rate for both  $\text{Ca}^{2+}$  and  
 101  $\text{Na}^+$  was approximately 12%. Figure S13 shows the time series of observed ion mass concentrations  
 102 and  $\text{EF}_{\text{Ca}}$ . The ion mass concentrations were above the detection limit. Particularly, the mean  $\text{Na}^+$   
 103 and  $\text{Ca}^{2+}$  mass concentrations were 364.64  $\text{ng m}^{-3}$  (ranging from 6.66 to 4580.10  $\text{ng m}^{-3}$ ) and 21.20  
 104  $\text{ng m}^{-3}$  (ranging from 0.27 to 334.40  $\text{ng m}^{-3}$ ), respectively, which were far above ( $> 10$  times) the  
 105 detection limit. Such data indicate that the variations of  $\text{EF}_{\text{Ca}}$  would not suffer the increasing  
 106 uncertainties when the ion mass concentrations near the detection limit. Thus, we suggest that the  
 107 data on ion mass concentration is reliable and representative.

108 Given that the measured mass concentrations of  $\text{Ca}^{2+}$  and  $\text{Na}^+$  were far above the detection  
 109 limit, we only considered the systematic errors ( $< 5\%$ ) of the mass concentrations of  $\text{Ca}^{2+}$  and  $\text{Na}^+$ .

110 Based on the variations of extreme value, the uncertainty of each  $\text{EF}_{\text{Ca}}$  is calculated as below:

$$111 \quad \text{abs}\left(1 - \frac{\frac{0.95 * Ca_{conc}^{2+}}{1.05 * Na_{conc}^+} / 0.038}{\frac{Ca_{conc}^{2+}}{Na_{conc}^+} / 0.038}\right) \approx 9.5\% < \text{Unc}_{(\text{EF}_{\text{Ca}})} < \text{abs}\left(1 - \frac{\frac{1.05 * Ca_{conc}^{2+}}{0.95 * Na_{conc}^+} / 0.038}{\frac{Ca_{conc}^{2+}}{Na_{conc}^+} / 0.038}\right) \approx 10.5\%$$

112 Where  $Ca_{conc}^{2+}$  and  $Na_{conc}^+$  represent the observed ion mass concentration of  $\text{Ca}^{2+}$  and  $\text{Na}^+$ ,  
 113 respectively. 0.038 is the ratio of  $\text{Ca}^{2+}$  to  $\text{Na}^+$  in seawater. 0.95 and 1.05 represent the variations of

114 extreme value. The largest uncertainty of  $EF_{Ca}$  ( $Unc_{(EF_{Ca})}$ ) would be estimated lower than 11%.

115 **SPAMS:** Even though SPAMS has advantages for investigating the chemical characteristics  
116 and evolutionary mechanisms of individual particles, it is still quite challenging for it to provide  
117 quantitative evidence, as it is limited by the potential matrix effects, laser inhomogeneities, and  
118 transmission efficiencies of the aerodynamic lenses (Qin et al., 2006; Pratt and Prather, 2012).  
119 Nevertheless, the results via SPAMS are also reliable because of its broad datasets with high  
120 temporal resolution. Therefore, the analyses of particle count, size, and chemical composition (by  
121 peak area) can be considered semi-quantitative from a statistical perspective (Healy et al., 2012; Su  
122 et al., 2021a; Zhang et al., 2021).

123 **Results:** The results of the  $Ca^{2+}$ ,  $K^+$ , and  $Mg^{2+}$  enrichment in SSAs calculated by ion mass  
124 concentration (via IGAC) are not fully supported by SPAMS datasets, which is not surprising. We  
125 propose three possible explanations for these results: (i) There is a difference in the size of collected  
126 particles between SPAMS (0.2–2  $\mu m$ ) and IGAC ( $\sim 10 \mu m$ ). In addition, SPAMS cannot measure  
127 the Aitken-mode particles and measures only the tail of accumulation-mode particles (Sierau et al.,  
128 2014). The hit rate of the SPAMS when measuring particles was relatively low ( $\sim 11\%$ ). (ii) The  
129 obtained type via IGAC (ion mass concentration) and SPAMS (mass spectral characteristics)  
130 datasets are different. In particular, the datasets via SPAMS are semiquantitative due to the potential  
131 matrix effects, laser inhomogeneities, and transmission efficiencies of the aerodynamic lens. (iii)  
132 IGAC can only measure the water-soluble  $Ca^{2+}$ , however, the water solubility of OC-Ca may be low.

133 Although there is a discrepancy between the two instruments, we consider our results to be  
134 reliable and representative. The quantitative results concluded by IGAC verify the enrichment of  
135  $Ca^{2+}$ ,  $K^+$ , and  $Mg^{2+}$  in the SSAs and subsequently reveal their dependence on and relevance to the

136 environmental factors. Previous studies have shown increasing  $\text{Ca}^{2+}$  enrichment in SSAs below 1  
137  $\mu\text{m}$  (Oppo et al., 1999; Hara et al., 2012; Cochran et al., 2016; Salter et al., 2016; Mukherjee et al.,  
138 2020). Thus, the individual particle analysis of particle types ranging in size from 0.2 to 2  $\mu\text{m}$  is  
139 very appropriate for revealing the calcium distribution in SSAs. Our results successfully identify a  
140 unique calcareous particle type (i.e., OC-Ca) and its specific mixing state, which provides some  
141 qualitative and semi-quantitative insights into the mechanisms behind calcium enrichment.

#### 142 **Text S4. Single-particle characteristics of other observed particles**

143 In this study, a total of  $\sim 930,000$  particles with mass spectral information and  $D_{va}$  were  
144 measured using SPAMS and manually clustered into the seven single-particle groups of SS (sea salt  
145 aerosol), SS-aged (aged sea salt aerosol), SS-Bio (sea salt with biogenic organic matter), OC-Ca  
146 (internally mixed organics with calcium), OC-K (internally mixed organics with potassium), OC  
147 (organic-carbon-dominated), and EC (element carbon) (Table S2). Based on their different mass  
148 spectral characteristics (Prather et al., 2013; Collins et al., 2014; Guasco et al., 2014; Su et al.,  
149 2021b), we briefly describe all of them (except for OC-Ca) as follows (Figure S5):

150 SS is identified by prominent ion markers that are associated with Na and Cl (e.g.,  $m/z$  23  $[\text{Na}]^+$ ,  
151 46  $[\text{Na}_2]^+$ , 81  $[\text{Na}_2^{35}\text{Cl}]^+$ , 83  $[\text{Na}_2^{37}\text{Cl}]^+$ , -35  $[\text{Cl}^-]$ , and -37  $[\text{Cl}^-]$ ), and smaller contributions of  
152 other inorganic matter that are known to exist in sea water (i.e., Mg, K, Ca). SS accounted for 16.5%  
153 of the particles obtained during the observation cruise, with a peak of  $\sim 1.25 \mu\text{m}$  in  $D_{va}$ .

154 SS-aged can be regarded as SS with atmospheric aging, with additional characteristic peaks of  
155 nitrate ( $m/z$  -46  $[\text{NO}_2]^-$  and -62  $[\text{NO}_3]^-$ ). SS-aged presented a similar size distribution as SS, with a  
156 proportion of 8.1%.



157 SS-Bio is characterized by a large ratio of organic ion signatures of organic nitrogen ( $m/z$  -26  
158  $[\text{CN}]^-$  and -42  $[\text{CNO}]^-$ ), phosphate ( $m/z$  -63  $[\text{PO}_2]^-$  and -79  $[\text{PO}_3]^-$ ), carbohydrate ( $m/z$  -45  $[\text{CHO}_2]^-$ ,  
159 -59  $[\text{C}_2\text{H}_3\text{O}_2]^-$ , and -73  $[\text{C}_3\text{H}_5\text{O}_2]^-$ ), siliceous materials ( $m/z$  -60  $[\text{SiO}_2]^-$ ), and organic carbon ( $m/z$  27  
160  $[\text{C}_2\text{H}_3]^+$  and 43  $[\text{C}_2\text{H}_3\text{O}_3]^+$ ), in addition to the aforementioned inorganic salt-related ion signature  
161 (e.g., 23  $[\text{Na}]^+$ ). SS-Bio accounted for only 3.1% of the particles obtained during the observation  
162 cruise, with a peak of  $\sim 0.9 \mu\text{m}$  in  $D_{va}$ .

163 OC-K is identified by the dominant presence of K ( $m/z$  39) and the aforementioned organic  
164 species and exhibited the third largest proportion (13.7%). OC-K was scattered in the  $D_{va}$  range of  
165 0.2 to 1.0  $\mu\text{m}$ , peaking at 0.6  $\mu\text{m}$ . Similar to OC-Ca, this chemical class may also be associated with  
166 biogenic origin, which may originate from intact heterotrophic bacterial cells, fragments of cells,  
167 and bacterial exudates (Gaston et al., 2011; Guasco et al., 2014; Sierau et al., 2014).

168 OC exhibits a significant proportion of organic signals of organic carbon and organic nitrogen.  
169 This single-particle type may originate from not only heterogeneous nucleation with the oxidation  
170 of monoterpene and isoprene but also anthropogenic emissions (e.g., ship emissions). However, we  
171 suggest that it is more likely to be related to the biogenic origin of the bacteria and phytoplankton.

172 **Text S5. Potassium ( $\text{K}^+$ ) and magnesium ( $\text{Mg}^{2+}$ ) enrichment in SSAs induced by temperature,**  
173 **wind speed, and sea ice**

174 The enrichment factors of  $\text{K}^+$  ( $\text{EF}_{\text{K}}$ ) and  $\text{Mg}^{2+}$  ( $\text{EF}_{\text{Mg}}$ ) were calculated by using the same  
175 equation described in the main text. Generally, the ratios of  $\text{K}^+$  and  $\text{Mg}^{2+}$  to  $\text{Na}^+$  in seawater are  
176 0.0218 and 0.1112, respectively (Hara et al., 2012; Boreddy and Kawamura, 2015; Su et al., 2022).

177 During the observation cruise,  $\text{EF}_{\text{K}}$  (ranging from 0.20 to 75, with a median and mean of 1.19

178 and 3.61, respectively,  $n > 1000$ ) and  $EF_{Mg}$  (ranging from 0.12 to 26.94, with a median and mean of  
179 1.48 and 2.46, respectively,  $n > 1000$ ) were also observed.

180 Figure S14 shows the enrichment factors of  $K^+$  and  $Mg^{2+}$  with respect to sodium in bulk  
181 aerosols at different ambient temperatures ( $\geq -3.5^\circ C$  and  $< -3.5^\circ C$ ), wind speeds ( $\geq 7 \text{ m s}^{-1}$  and  $< 7$   
182  $\text{m s}^{-1}$ ), and sea ice fraction (with and without sea ice) during the whole sampling period. The results  
183 were very similar to that of calcium ( $Ca^{2+}$ ) enrichment in SSAs, which may present an analogous  
184 enrichment mechanism by environmental factors (e.g., ambient temperature and wind speed with  
185 sea ice) (Fig. S15).

186 We also inferred that the  $K^+$  and  $Mg^{2+}$  enrichments in SSAs were also attributed to organically  
187 internally mixed aerosols (e.g., OC-K and SS-Bio). We propose three possible explanations for this:  
188 (i) If the released  $K^+$  and  $Mg^{2+}$  are in the form of inorganic salts (e.g.,  $KCl$  and  $MgCl_2$ ) within SSAs,  
189 they are likely to be associated with sea salt fractionation by precipitations of sylvite ca.  $-33^\circ C$  and  
190  $10 \text{ H}_2\text{O} \cdot \text{MgCl}_2$  ca.  $-36^\circ C$  on the sea ice (Hara et al., 2012). However, the average and minimum  
191 ambient temperatures during leg I were only  $-4.1^\circ C$  and  $\sim -8^\circ C$ , respectively. Thus, sea salt  
192 fractionation on sea ice is less likely. (ii) We observed a single-particle type of OC-K with abundant  
193  $K^+$  ( $m/z$  39) and organic ion signatures by using SPAMS during the cruise observations. Other  
194 single-particle types involving  $K^+$  ( $m/z$  39) and  $Mg^{2+}$  ( $m/z$  24) also exhibited some characteristic  
195 organic peaks (e.g., in SS-Bio). (iii)  $K^+$  and  $Mg^{2+}$  are also greatly capable of stabilizing organic  
196 supramolecular structures in the form of organic ligands (i.e., marine microgels) (Gaston et al., 2011;  
197 Cochran et al., 2016; Mukherjee et al., 2020). Based on the above discussion, we therefore suggest  
198 that internally mixed potassium and magnesium organics contribute to corresponding enrichment in  
199 SSAs. Analogous to OC-Ca, we also suggest that the marine microgels assembled by  $K^+$  and  $Mg^{2+}$

200 to exopolymer substances (EPSs) may be emitted to the atmosphere by low wind-blown sea ice.

201 **Text S6. Further correlation analysis between mass concentration of Ca<sup>2+</sup>, single-particle type**  
202 **of OC-Ca, and single-particle type of SS**

203 We noted there was a relatively poor correlation ( $r = 0.51$ ,  $p < 0.05$ ) between sodium and  
204 calcium mass concentrations, probably indicating some differences in their origin, chemical form,  
205 and water solubility (Fig. S9). As discussed in the main text, we concluded that there were four  
206 possible origins for water-soluble Ca<sup>2+</sup> collected by IGAC, including (1) sea salt fractionation (i.e.,  
207 ikaite, CaCO<sub>3</sub>·6H<sub>2</sub>O), (2) long-range transport of dust or anthropogenic emissions, (3) coexistence  
208 with sea salt aerosol (i.e., the single-particle type of SS-Ca) and (4) calcium internally mixed  
209 organics (OC-Ca). The first two origins were excluded based on the discussion in the main text and  
210 Text S4.

211 In terms of the third possible origin (i.e., coexistence with sea salt aerosols), we noted that there  
212 were relatively poor correlations between the SS-Ca ( $r = 0.21$ ,  $p < 0.05$ , by count and  $r = 0.03$ ,  $p <$   
213  $0.05$ , by peak area of  $m/z$  40 [Ca]<sup>+</sup>) and mass concentration of Ca<sup>2+</sup> (Table S5). This indicated that  
214 the single-particle type of SS-Ca had a certain contribution to the water-soluble mass concentration  
215 of Ca<sup>2+</sup>. We suggest that this part of calcium is inorganic and water-soluble because we did not  
216 observe organic signals (e.g., organic nitrogen, phosphate, and carbohydrate). This may not be the  
217 major reason for the Ca<sup>2+</sup> enrichment in SSA.

218 We suggest that OC-Ca may be important for the higher EF<sub>Ca</sub> observed, which is supported by  
219 the increased correlations between the OC-Ca (by count and by peak area of  $m/z$  40 [Ca]<sup>+</sup>) and mass  
220 concentration of Ca<sup>2+</sup> that varied with increasing EF<sub>Ca</sub> (Table S5). Considering the possible influence

221 of water-soluble components (e.g.,  $\text{CaCl}_2$ ,  $\text{Ca}(\text{NO}_3)_2$ , and  $\text{CaSO}_4$ ), we classified OC-Ca into two  
222 parts: OC-Ca-Organic (~ 147, 000, by count) and OC-Ca-Inorganic (~ 283, 000, by count) (Fig.  
223 S12). Compared to the former, the latter presented typical inorganic ion characteristic peaks of  
224 chloride ( $m/z$  -35 and -37), nitrate ( $m/z$  -62), and sulfate ( $m/z$  -97) and was probably more water-  
225 soluble. We noted that both presented similar variations in which the correlations between the OC-  
226 Ca (by count and by peak area of  $m/z$  40  $[\text{Ca}]^+$ ) and mass concentration of  $\text{Ca}^{2+}$  varied with  
227 increasing  $\text{EF}_{\text{Ca}}$  (Table S5). However, OC-Ca-Organic exhibited stronger correlations than did OC-  
228 Ca-Inorganic ( $r = 0.51$  vs.  $r = 0.28$ ,  $p < 0.05$ , by count and  $r = 0.51$  vs.  $0.31$ ,  $p < 0.05$ , by peak area  
229 of  $m/z$  40  $[\text{Ca}]^+$ , respectively), which may emphasize the importance of OC-Ca-Organic to the  
230 enrichment of  $\text{Ca}^{2+}$ . That is, the potential contribution of organically complexed calcium may be  
231 ignored, when considering the calcium enrichment in SSAs based on water-soluble  $\text{Ca}^{2+}$ .

232 Direct measuring the hygroscopicity of the OC-Ca remained a technical challenge in this study.  
233 Nevertheless, we could infer that OC-Ca was hygroscopic to some extent, based on the results from  
234 Cochran et al. (2017), because they concluded that the mixture of sea salt with organic matter (i.e.,  
235 the single-particle type of SS-OC and OC) can also exhibit a certain hygroscopicity (hygroscopicity  
236 parameter, 0.50-1.27).

### 237 **Text S7. Multiple linear and random forest regression**

238 Multiple linear and random forest analyses were applied to describe the relative contribution  
239 of possible factors to the variations in  $\text{EF}_{\text{Ca}}$ . In multiple linear models, two of the most common  
240 measures of model fit are the residual standard error and proportion of variance explained ( $R^2$ ), by  
241 using least squares fit. In contrast, random forest with nonlinear multiple regression has been widely

242 applied to predict and reproduce the importance of factors, by building multiple decision trees  
243 (Lundberg et al., 2020; Zhang et al., 2021; Song et al., 2022).

244 We attempted to estimate the relative importance of the impact factors on  $EF_{Ca}$ , including the  
245 environmental factors (ambient temperature, wind speed, and chlorophyll-a concentration), particle  
246 types (SS-Ca and OC-Ca, by count), and relative fraction of organics in the OC-Ca particles. The  
247 multiple linear regression and random forest analysis were applied. As shown in Fig. S16,  $EF_{Ca}$   
248 could not be well predicted by those possible factors for the sea ice period ( $r^2 = 0.19$ ,  $p < 0.01$ ) and  
249 whole sampling period ( $r^2 = 0.15$ ,  $p < 0.01$ ), which may be ascribed to other unknown mechanisms  
250 and/or OC-Ca with low water solubility. Future studies are needed to explore the mechanisms of  
251 calcium enrichment in SSAs.

252 **Text S8. A comparative analysis of chemical composition, particle size and counts, and mixing**  
253 **state via SPAMS between leg I and leg II**

254 Based on the SPAMS datasets, we found that there was a minimal change in chemical  
255 composition (Figs. S17 and S18), particle size (Fig. S19) and counts (Fig. S20), and mixing state  
256 (Figs. S21 and S22) of the obtained particles (especially SS-Bio, OC-Ca, and OC-K) during leg I  
257 (sea ice period) and leg II (period without Sea ice). This suggests that the existence of sea ice may  
258 play an insignificant role in the intrinsic physicochemical properties of the obtained particles  
259 ranging from 0.2 to 2  $\mu\text{m}$ .

260

261 2. Supplementary Figures

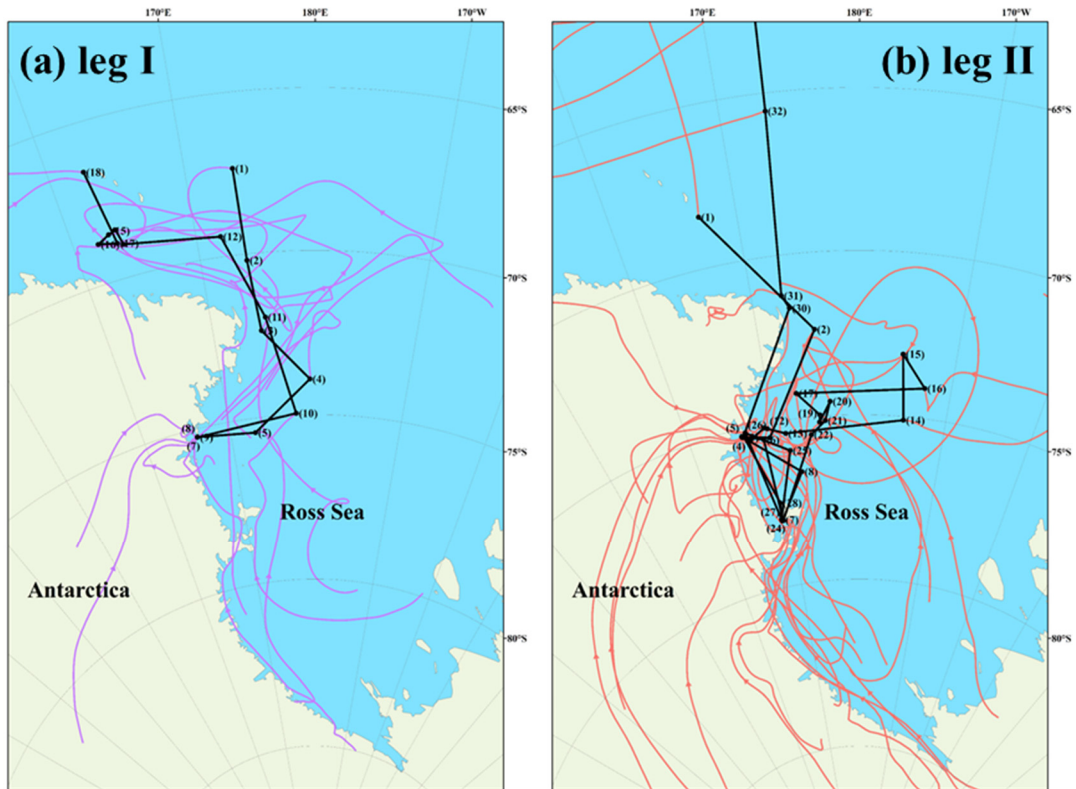

262

263 Figure S1

264 HYSPLIT back trajectories (72) arriving at the ship location (50 m above sea level) every day (0:00

265 local time) during leg I (purple solid line) and leg II (red solid-line). The black solid-lines indicate

266 the cruise track of the R/V *Xuelong*. The marked numbers indicate the ship location at the local time

267 0:00 during the whole observation. For example, "(1)" in leg I refers to the ship location at 0:00, on

268 2 December 2017, and so on.

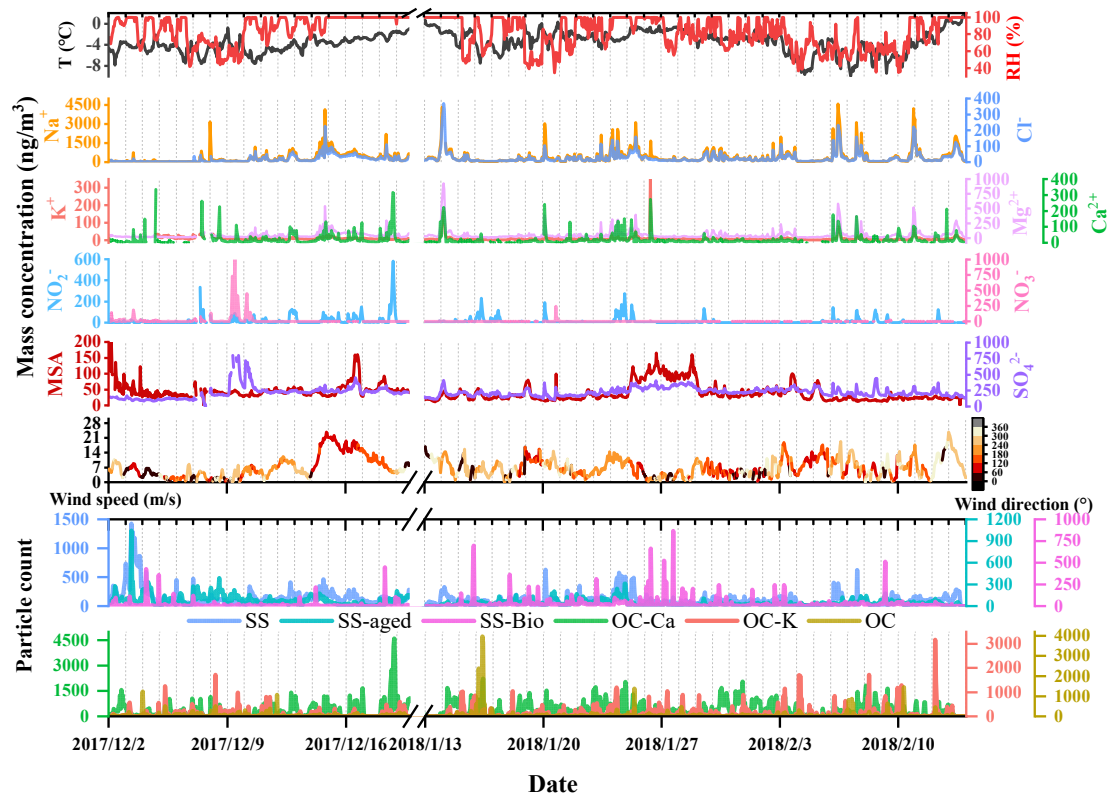

269

270 Figure S2

271 Time series (hourly temporal resolution) of meteorological parameters, typical water-soluble ion

272 mass concentrations, and single-particle counts of individual particle types.

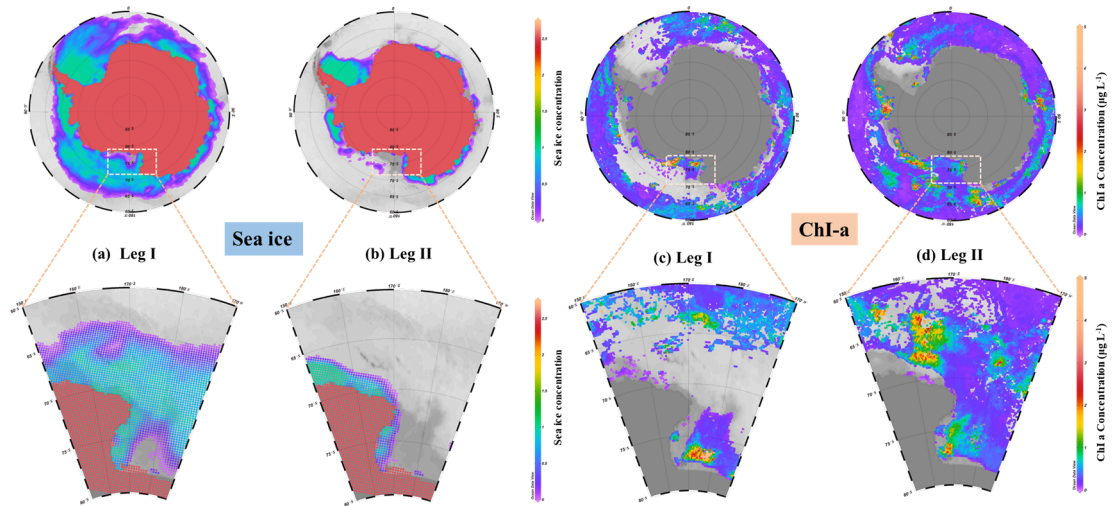

273

274 Figure S3

275 Average sea ice fraction and chlorophyll-a concentration during leg I (a and c) and leg II (b and d)

276 from a satellite. This figure was created by using Ocean Data View (Schlitzer, 2002).



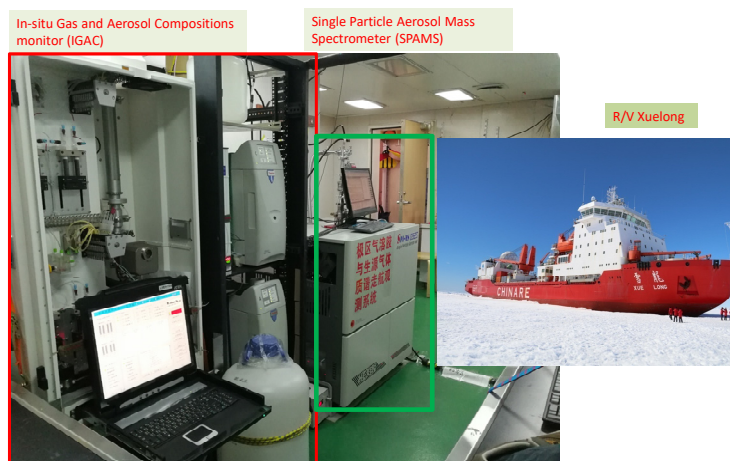

277

278 Figure S4

279 An in situ Gas and Aerosol Composition monitoring system (IGAC) was used to determine the  
280 gaseous and aerosol water-soluble ion mass concentrations (red frame, left). A Single Particle  
281 Aerosol Mass Spectrometer (SPAMS) was used to measure the chemical compositions, mixing  
282 states and particle size of individual particles (green frame, right).

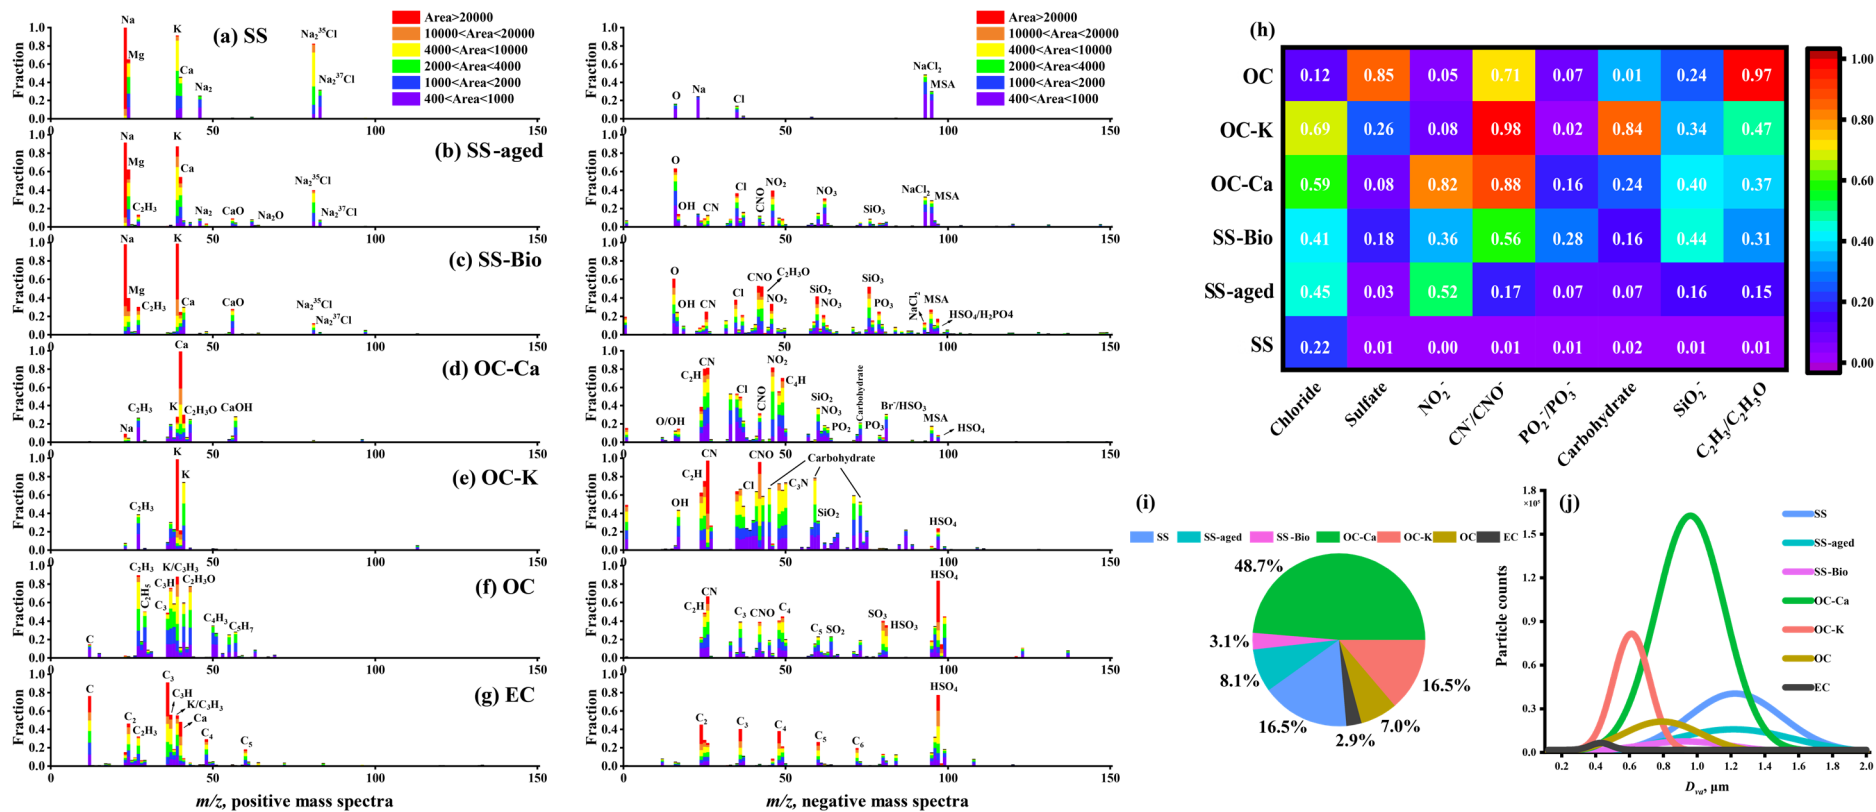

283

284 Figure S5

285 (a) – (g) Average digitalized single-particle mass spectra for seven classes of collected particles. (h) Hot plot of number fractions for major species of obtained single-

286 particle types, including chloride ( $m/z$  -35 and -37), sulfate ( $m/z$  -97), nitro-containing organic species ( $m/z$  -46), organic nitrogen ( $m/z$  -26 or -42), phosphate ( $m/z$  -63  
287 or -79), carbohydrate ( $m/z$  -45, -59, or -73), siliceous materials ( $m/z$  -60), and organic carbon ( $m/z$  -27 or 43). (i) Relative proportion of different single-particle types  
288 during the cruise observations. (j) Unscaled size-resolved number distributions of all individual particles.

289 A total of  $\sim 580,000$  calcium-containing particles ( $m/z$  40  $[\text{Ca}]^+$ ) were observed during cruise observations, accounting for  $\sim 62\%$  of the total obtained particles.  
290 These calcium-containing particles were scattered among all the obtained particle types, with proportion of  $\sim 48\%$ ,  $\sim 56\%$ ,  $\sim 25\%$ ,  $\sim 22\%$ ,  $\sim 100\%$ ,  $\sim 12\%$ , and  $\sim 49\%$  for  
291 SS, SS-aged, SS-Bio, OC-K, OC-Ca, OC, and EC, respectively. In particular, the SS-Ca and OC-Ca particle types accounted for  $\sim 12\%$  and  $\sim 72\%$  of the total of  
292 calcium-containing particles and  $\sim 7\%$  and  $\sim 50\%$  of the total obtained particles, respectively.

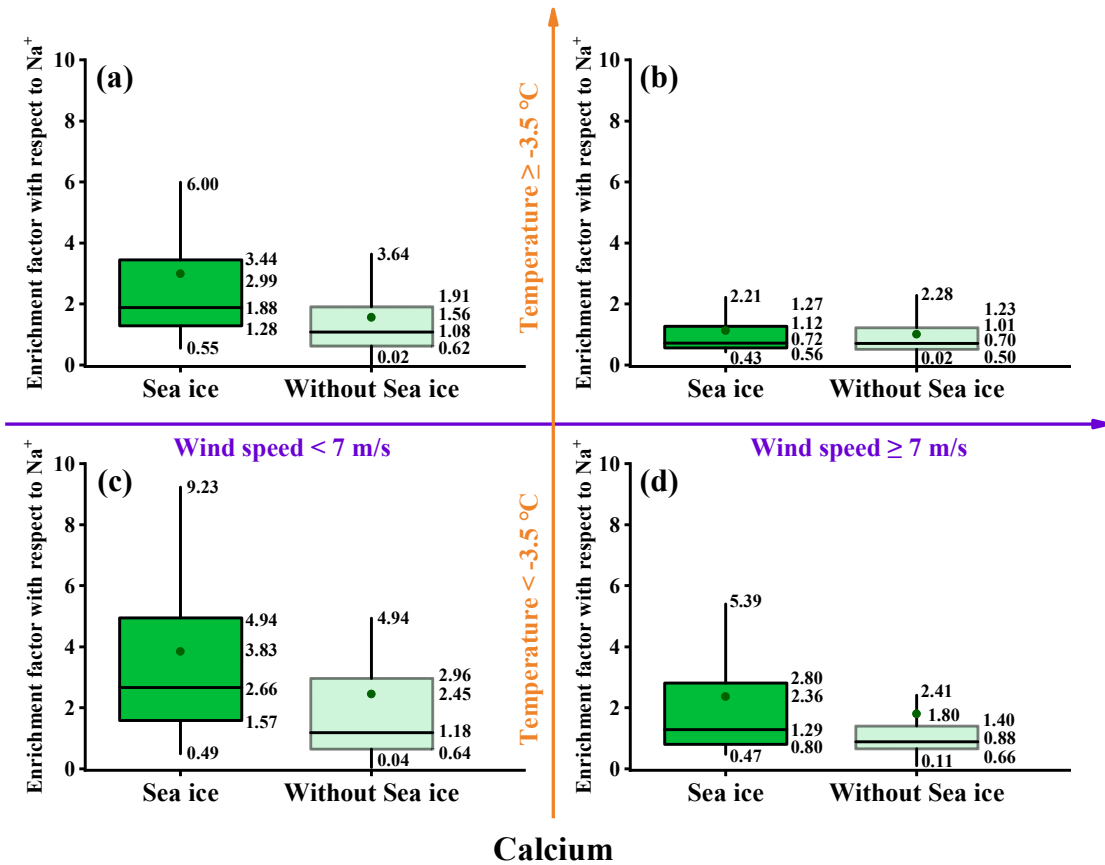

**Calcium**

293

294 Figure S6

295 A box and whisker plot of hourly  $\text{Ca}^{2+}$  enrichment factors ( $\text{EF}_{\text{Ca}}$ ) with respect to  $\text{Na}^+$  at different  
 296 ambient temperatures, wind speeds, and sea ice fraction. In the box and whisker plots, the marked  
 297 values from top to bottom are the 90th and 75th percentiles, mean, median, and 25th and 10th  
 298 percentiles, respectively.

299 In comparison with the bubble charts (Fig. 1 in main text), the box and whisker plot present similar  
 300 intensions in different forms.

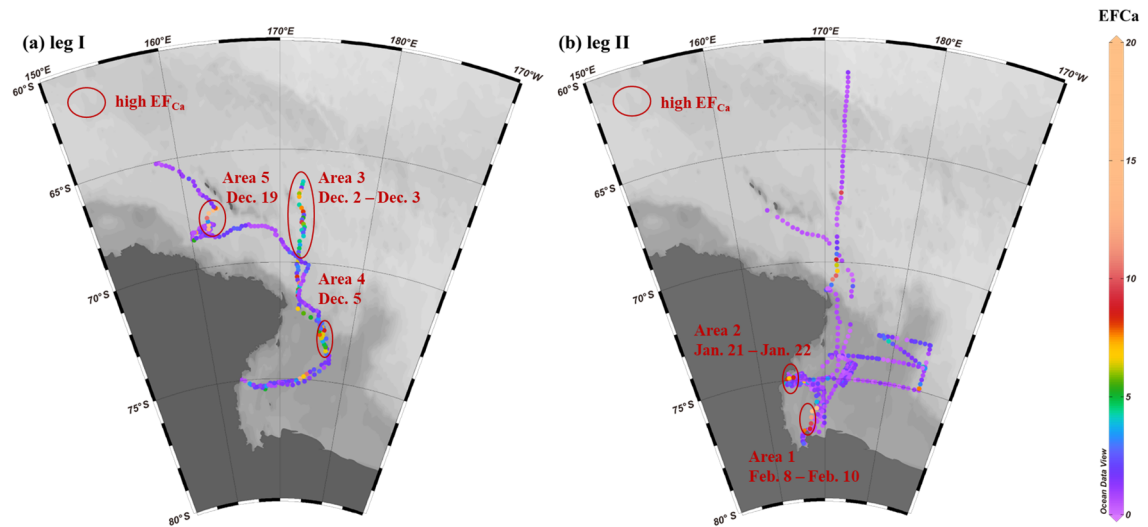

301

302 Figure S7

303 A comparative analysis of the EF<sub>Ca</sub> values between leg I and leg II of the R/V *Xuelong* cruise over

304 the Ross Sea, Antarctica. We manually classified the five high EF<sub>Ca</sub> areas (marked in red), which

305 could be seen in detail in Table S4.

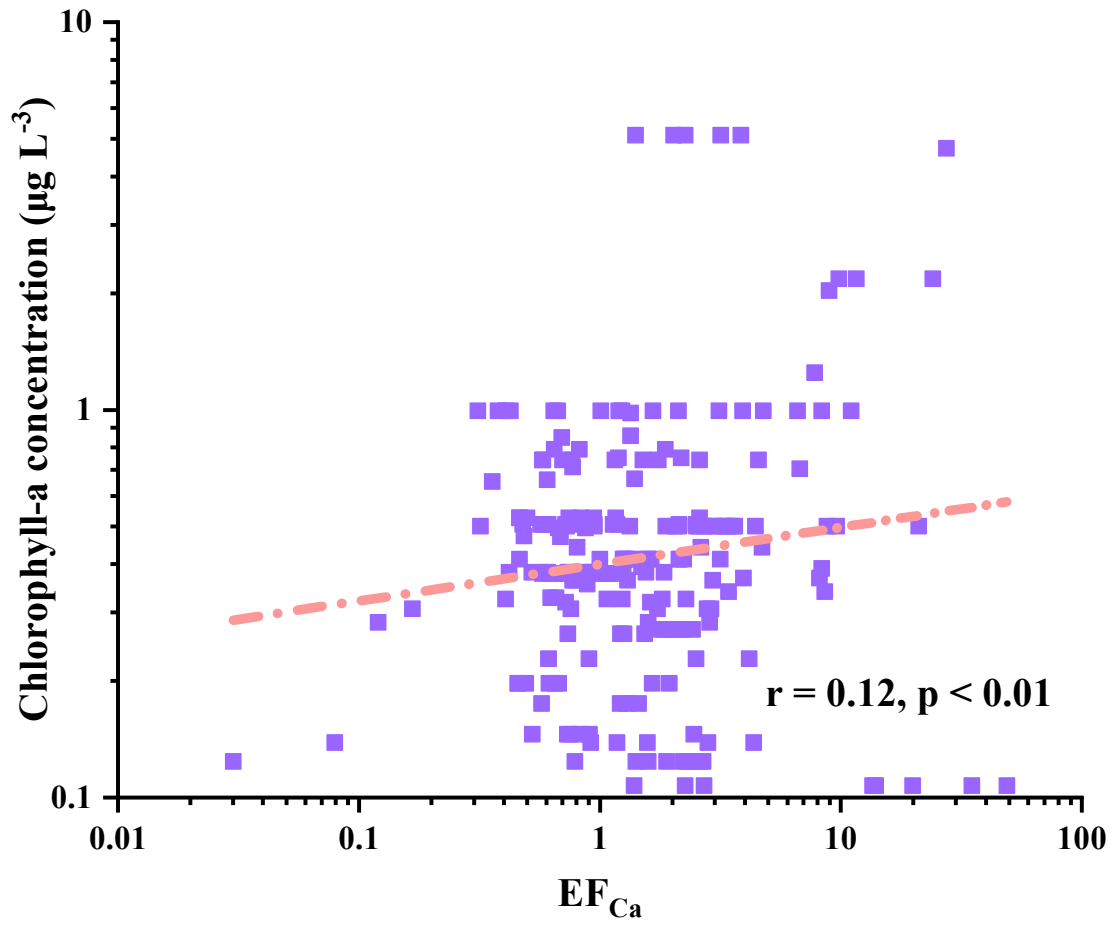

306

307 Figure S8

308 Correlation analysis between  $EF_{Ca}$  and chlorophyll-a concentration during leg II.

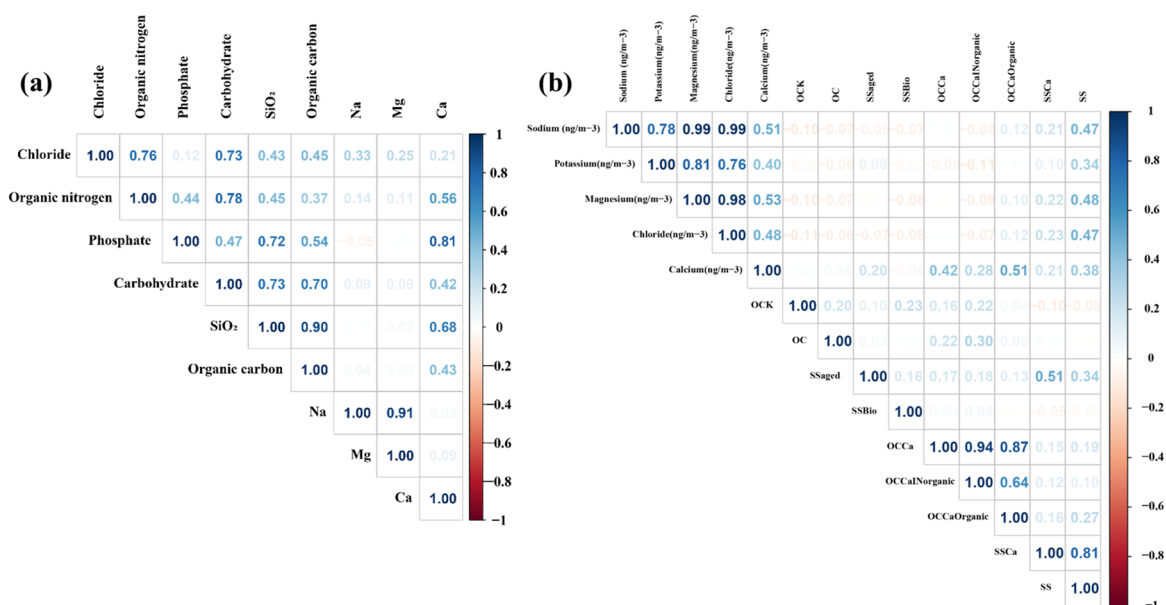

309

310 Figure S9

311 (a) Correlation analysis between the single-particle peak area for species in OC-Ca. There are

312 relatively high correlation coefficients ( $r = 0.42\text{--}0.81$ ) between the peak area of Ca and organic

313 species (organic nitrogen, phosphate, carbohydrate, siliceous materials, and organic carbon). (b)

314 Correlation analysis between the OC-Ca (by count) and mass concentration of Ca<sup>2+</sup>. The first

315 (sodium) to fifth (chloride) refer to mass concentration. The sixth (OCK) to fourteenth (SS) refer to

316 single-particle types.

317

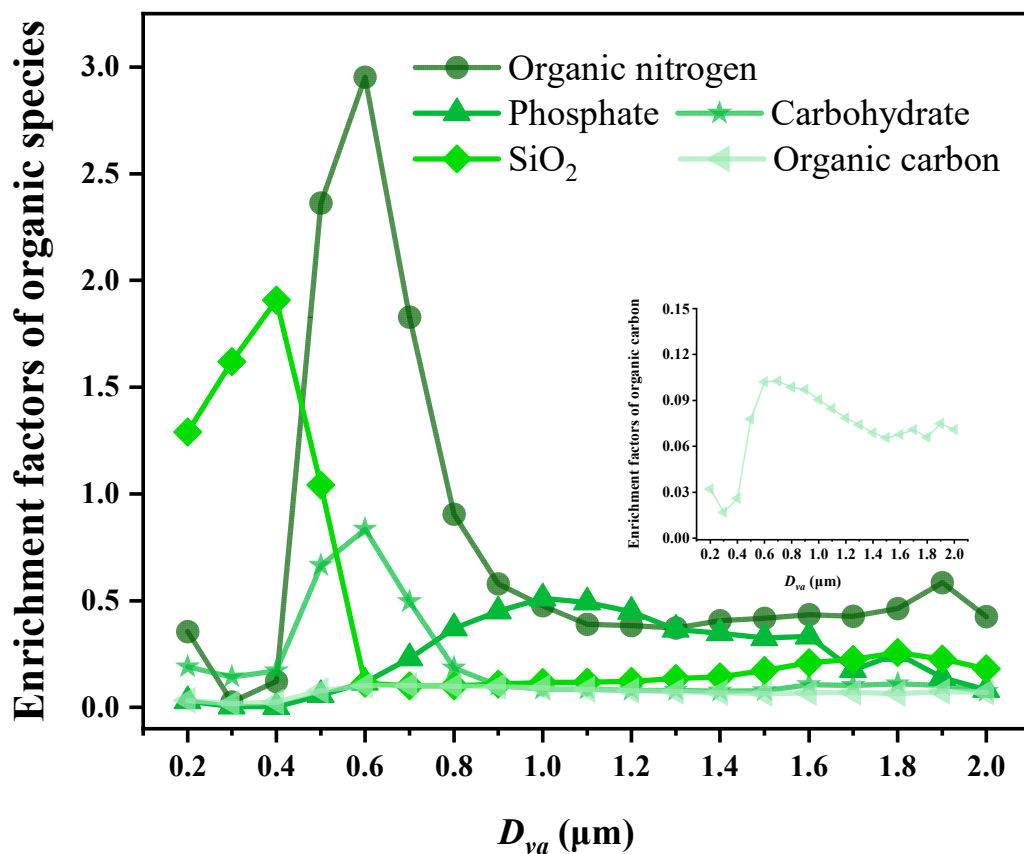

318

319 Figure S10

320 Size-dependent single-particle peak area ratio of organic matter to calcium. Based on SPAMS, we

321 define the organic matter enrichment factors as the single-particle peak area ratio of organic species

322 to Ca ( $m/z$  40) in OC-Ca. The single-particle counts of OC-Ca are 420, 000. The organic species

323 include organic nitrogen ( $m/z$  -26 and -42), phosphate ( $m/z$  -63 and -79), carbohydrate ( $m/z$  -45, -59,

324 and -73), siliceous materials ( $\text{SiO}_2$ ,  $m/z$  -60), and organic carbon ( $m/z$  27 and 43).

325



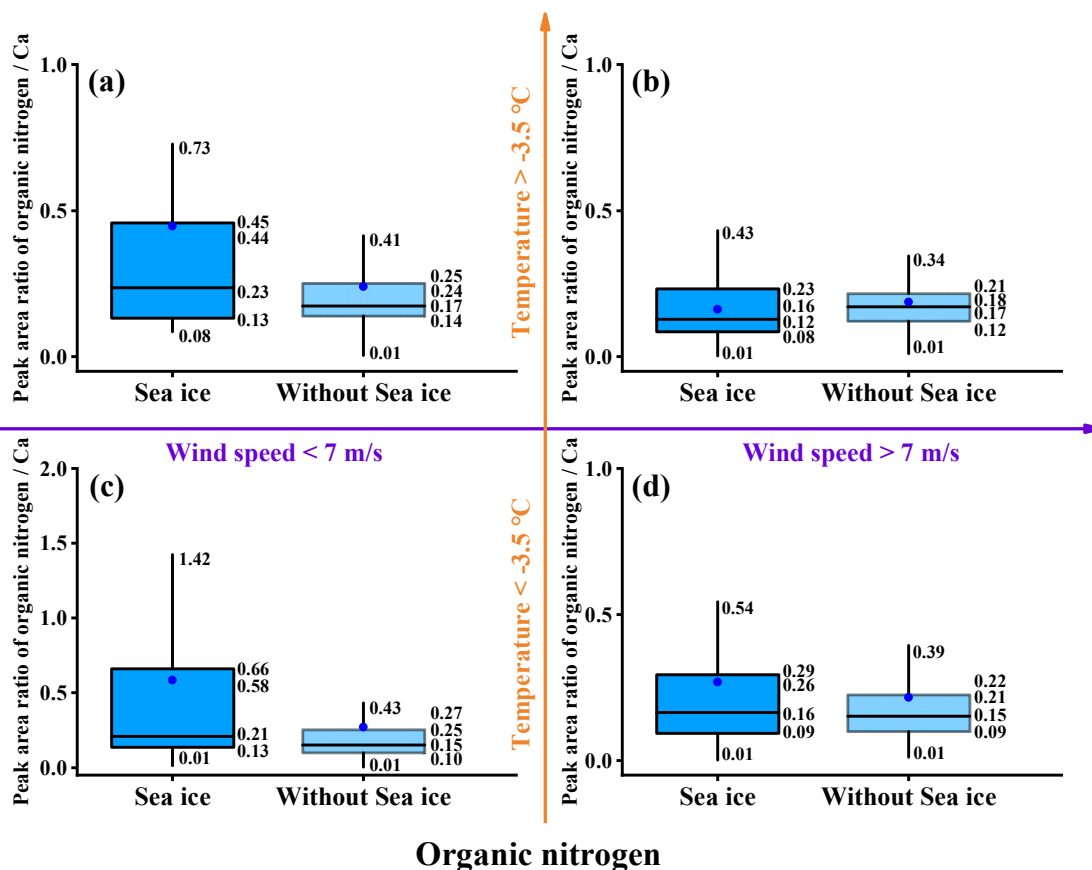

326

327 Figure S11

328 A box and whisker plot of the peak area ratio of organic nitrogen ( $m/z$  -26 and -42) to Ca ( $m/z$  40)

329 in OC-Ca at different ambient temperatures, wind speeds, and sea ice fraction. As described above,

330 the organic nitrogen enrichment factor in OC-Ca ( $EF_{ON}$ ) is defined as the single-particle peak area

331 ratio of organic nitrogen to calcium. We chose the organic nitrogen within OC-Ca for comparative

332 analysis because of its large number fraction (0.88). In the box and whisker plot, the marked values

333 from top to bottom are 90th and 75th percentiles, mean, median, and 25th and 10th percentiles,

334 respectively.

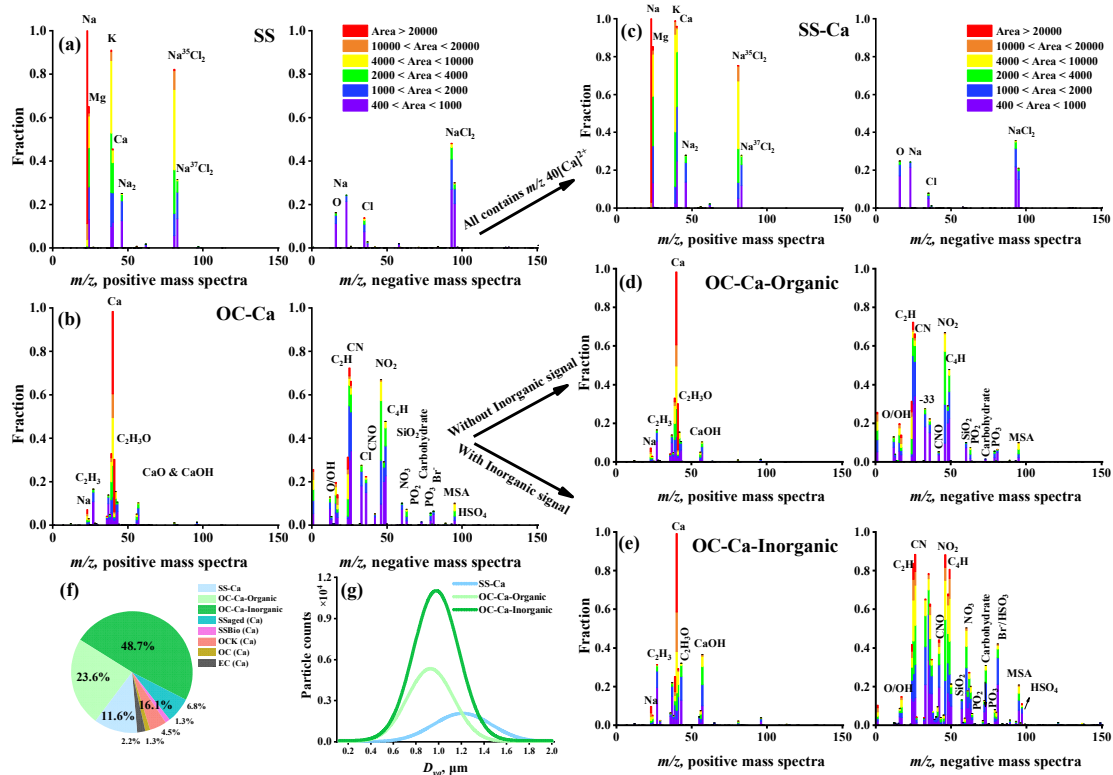

335

336 Figure S12

337 (a) and (b) Average digitalized single-particle mass spectra of chemical classes of SS and OC-Ca.

338 (c) Average digitalized single-particle mass spectra of SS-Ca that are refined by using  $m/z$  40 [Ca]<sup>2+</sup>

339 upon SS. (d) and (e) Average digitalized single-particle mass spectra of OC-Ca-Organic and OC-

340 Ca-Inorganic, which are classified by whether inorganic compounds (chloride ( $m/z$  -35 and -37),

341 nitrate ( $m/z$  -62), and sulfate ( $m/z$  -97) ion signals are present. (f) Relative proportion and (g)

342 unscaled size-resolved number distributions of single-particle types.

343 **Note:** Figures S13-S22 were used when discussing supplementary Text (S3, S5, S7, and S8) and  
344 were not cited in the main-text.

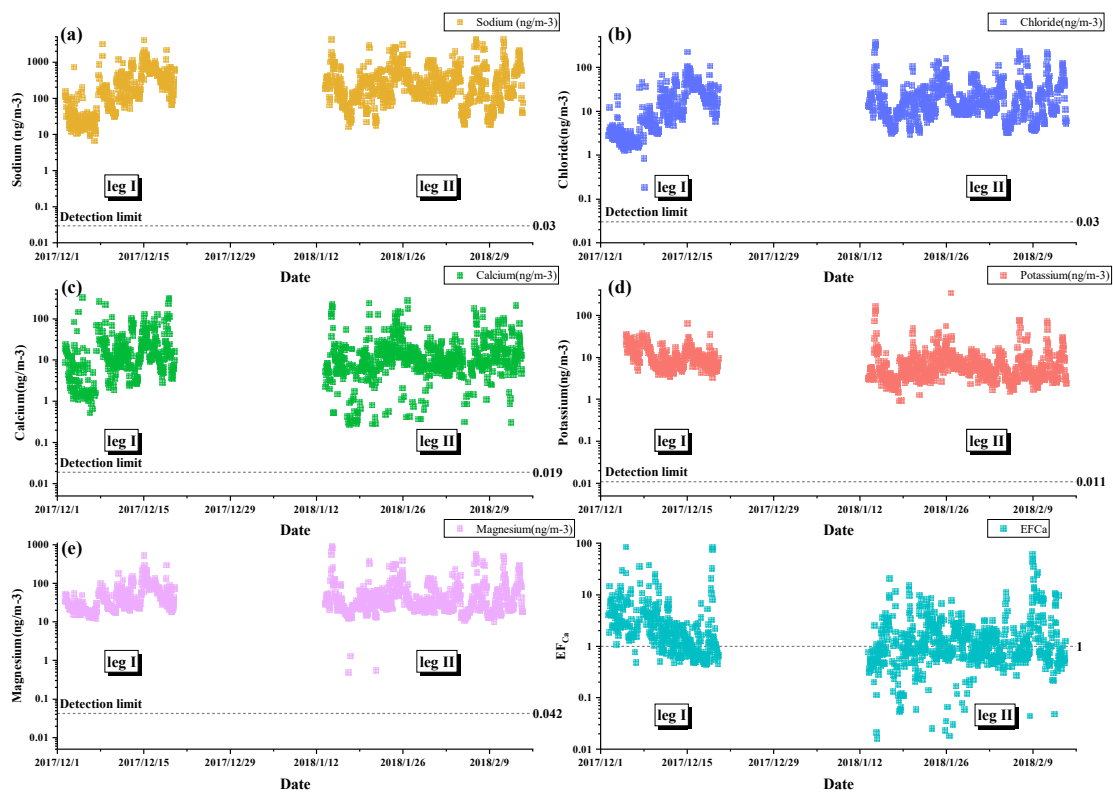

345

346 Figure S13

347 The time series of observed ion mass concentrations and  $EF_{Ca}$ .

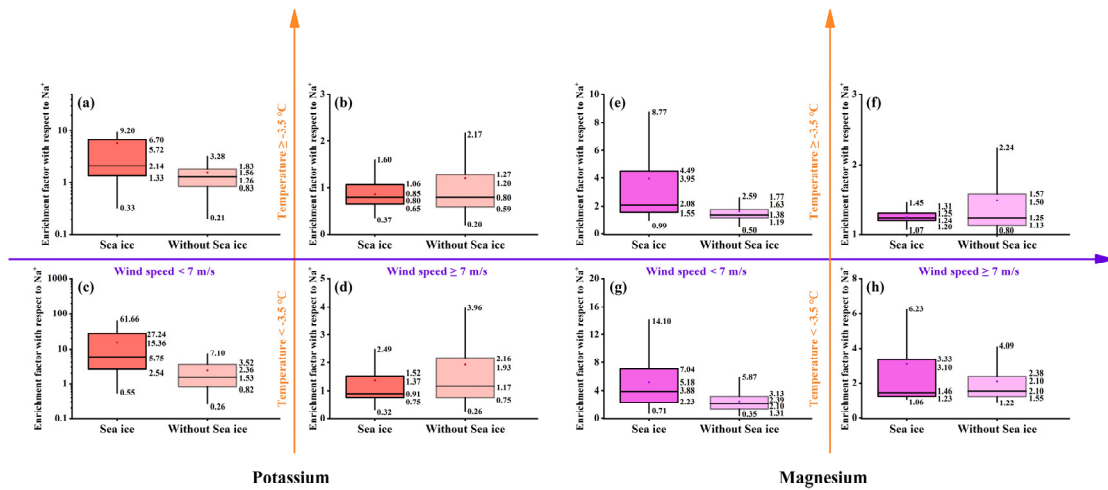

348

Potassium

Magnesium

349 Figure S14

350 Box and whisker plots of hourly  $\text{Ca}^{2+}$  enrichment factor ( $\text{EF}_{\text{Ca}}$ ) with respect to  $\text{Na}^+$  at different  
 351 ambient temperatures, wind speeds, and sea ice fraction. In the box and whisker plots, the marked  
 352 values from top to bottom are the 90th and 75th percentiles, mean, median, and 25th and 10th  
 353 percentiles, respectively. In comparison with the bubble charts (Fig. S15), the box and whisker plots  
 354 present similar intensions with different forms.

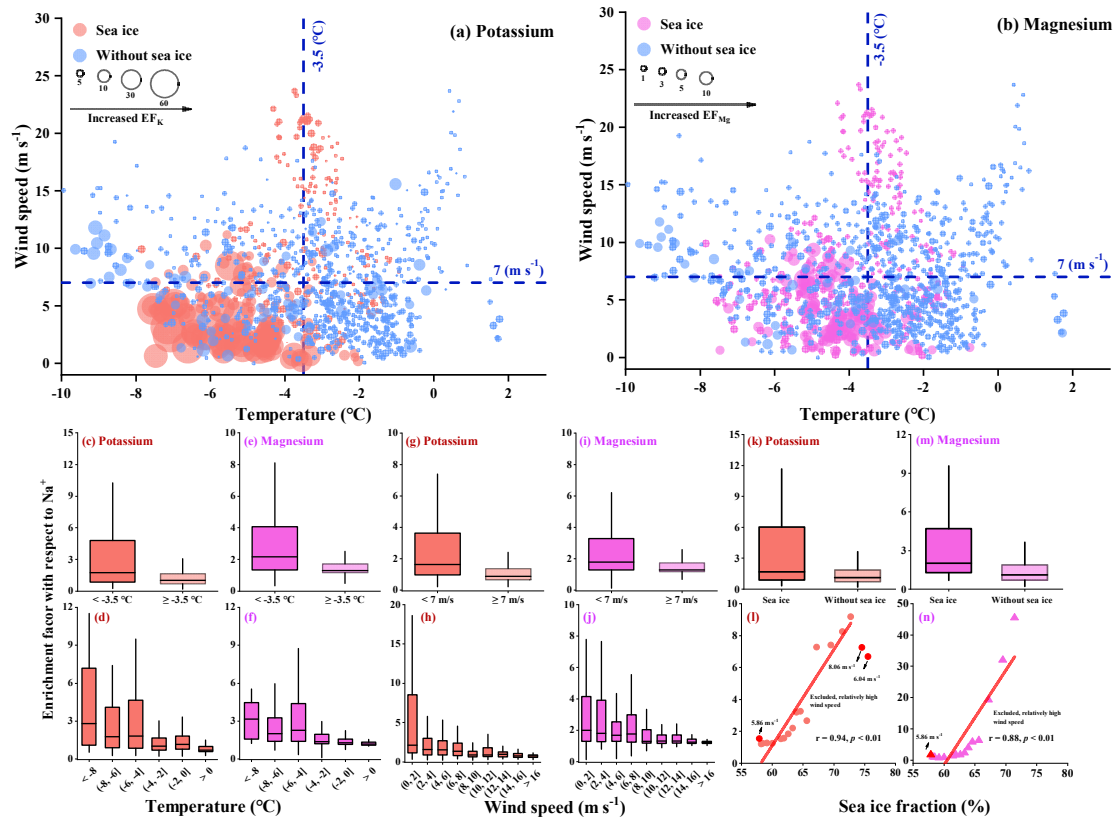

355

356 Figure S15

357 Bubble charts of hourly (a)  $K^+$  and (b)  $Mg^{2+}$  enrichment factors with respect to  $Na^+$  at the ambient  
 358 temperatures, wind speeds, and sea ice fraction. The enrichment factors of  $K^+$  and  $Mg^{2+}$  with respect  
 359 to  $Na^+$  varied as a function of the ambient temperature (c-f), wind speed (g-j), and sea ice fraction  
 360 (k-n) during the cruise observation. In the box and whisker plot, the lower, median, and upper lines  
 361 of the box denote the 25th, 50th and 75th percentiles, respectively.

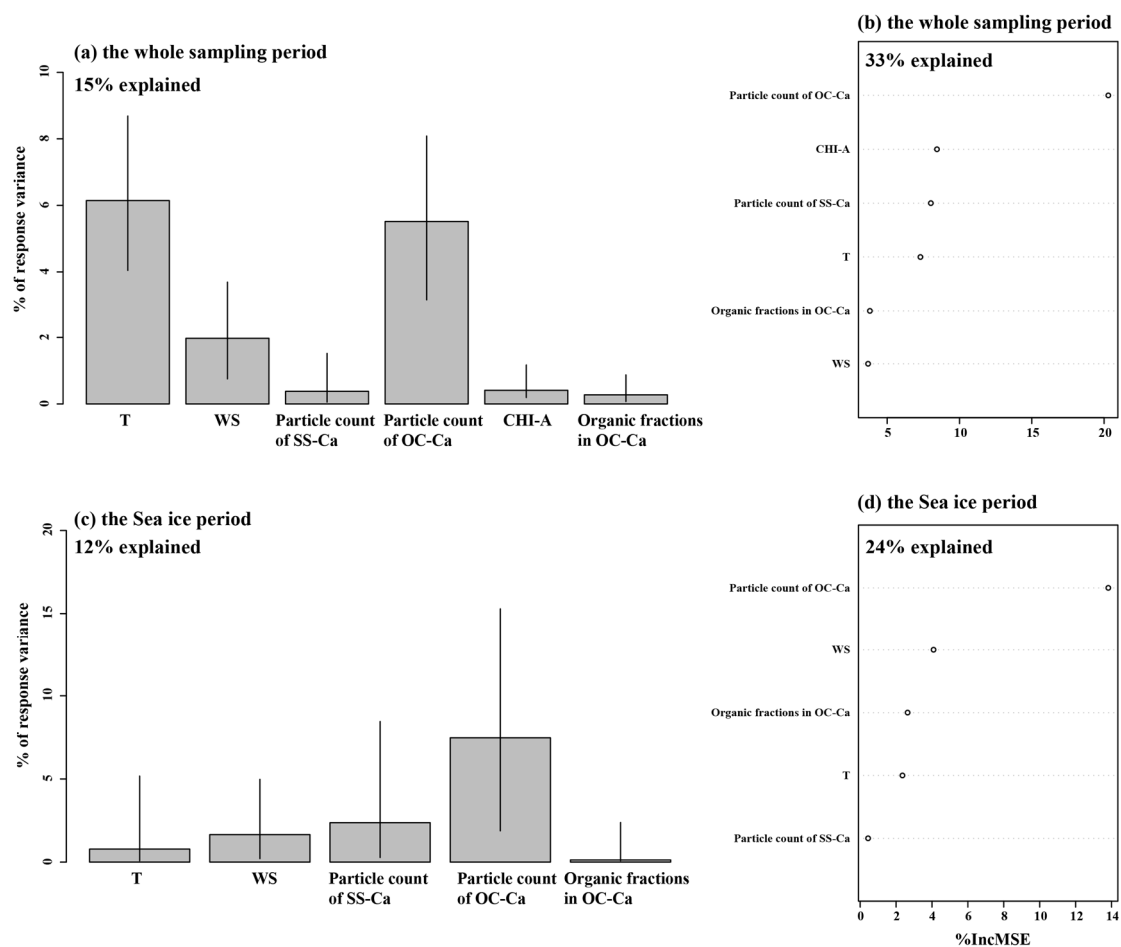

362

363 Figure S16

364 The relative importance to the variation in  $EF_{Ca}$ , as determined by multilinear regression for (a) the  
 365 whole sampling period and (c) the sea ice period. The error bars provide 90% confidence intervals  
 366 with 100 bootstrap replicates to evaluate the results. The relative importance of the predictors in the  
 367 random forest analysis for the  $EF_{Ca}$  for (b) the whole sampling period and (d) the sea ice period.  
 368 The %IncMSE, which is used as an indicator for the relative contribution to the predicted variable,  
 369 refers to the increased mean square-error when each independent variable is removed from the  
 370 predictors.

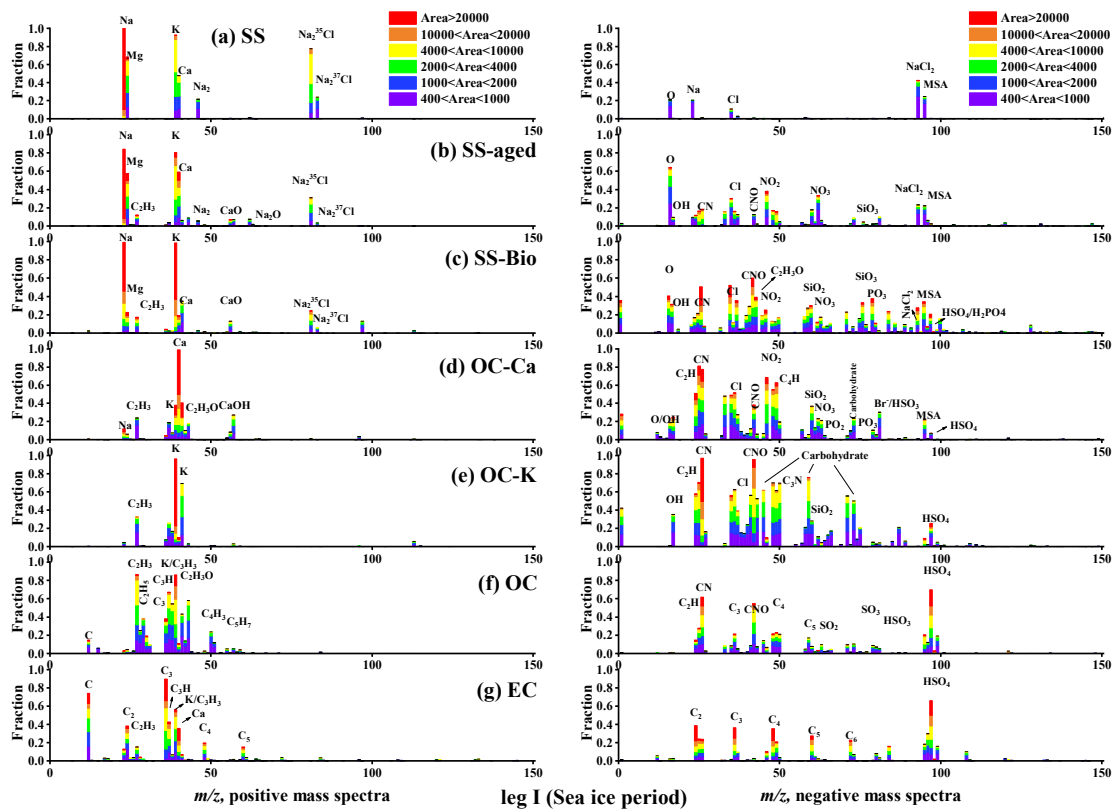

371

372 Figure S17

373 Average digitalized single-particle mass spectra for seven classes of collected particles during leg I

374 (sea ice period).

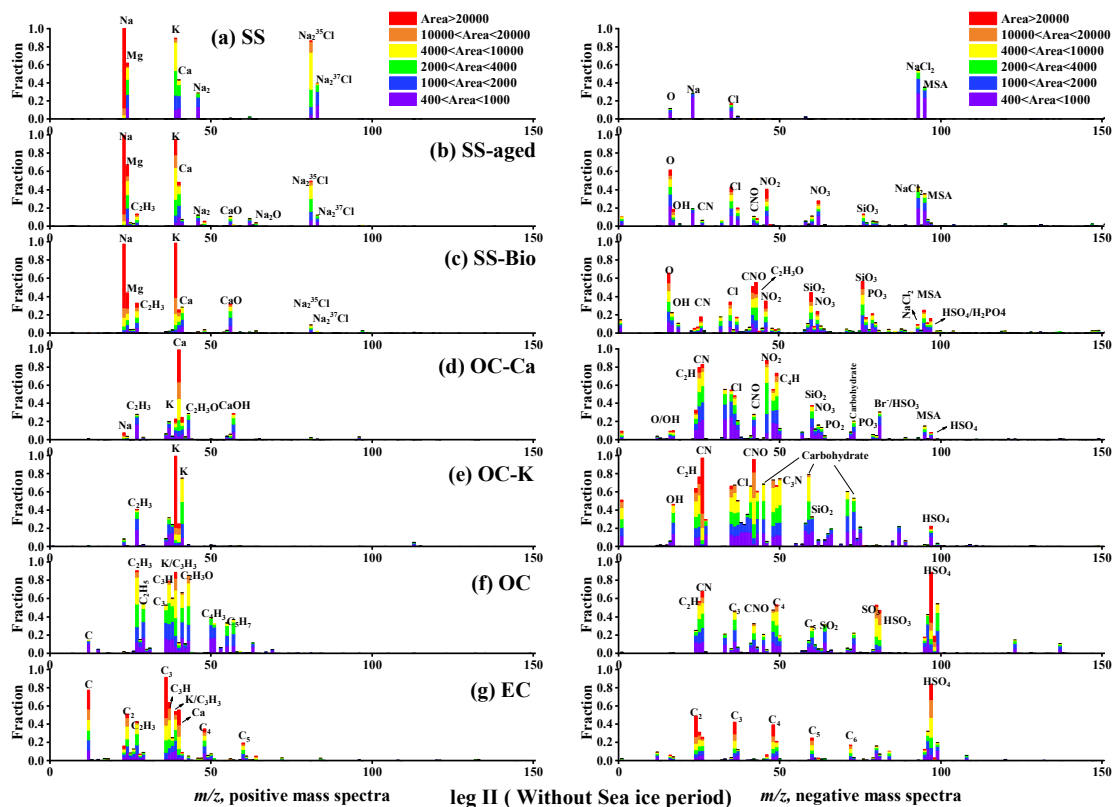

375

376 Figure S18

377 Average digitalized single-particle mass spectra for seven classes of collected particles during leg

378 II (period without sea ice).



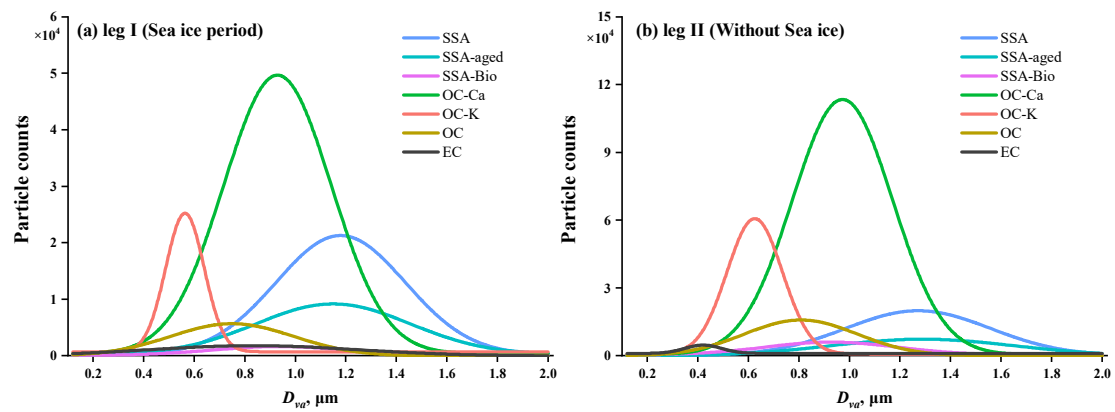

379

380 Figure S19

381 Unscaled size-resolved number distributions of all individual particles during leg I (sea ice period)

382 and leg II (period without sea ice).

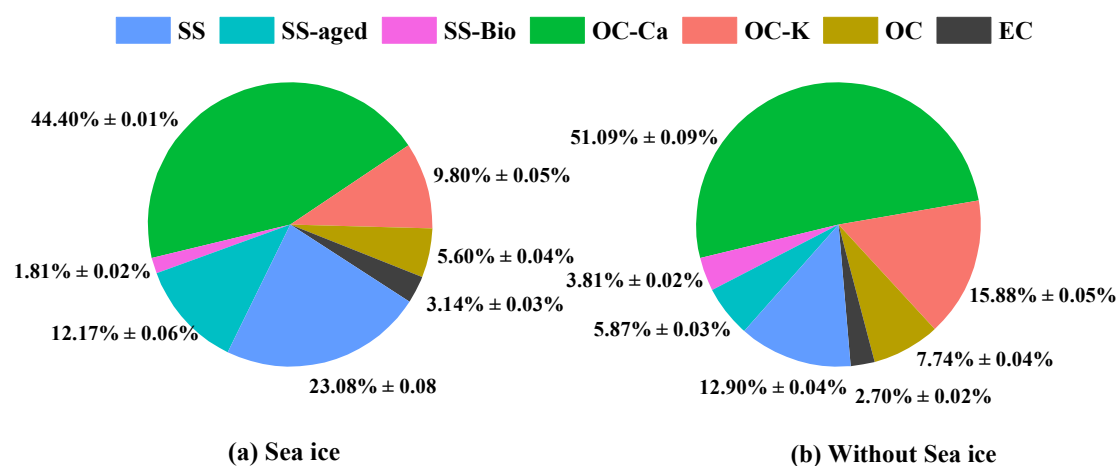

383

384 Figure S20

385 Relative proportion of different single-particle types during leg I (sea ice period) and leg II (period  
 386 without sea ice). It is still quite a challenge to obtain quantitative measurements using SPAMS due  
 387 to the potential inhomogeneities in the transmission efficiencies of the aerodynamic lenses and  
 388 desorption/ionization, and the matrix effects of individual particles (Gross et al., 2000; Qin et al.,  
 389 2006; Pratt and Prather, 2012). Therefore, it may not be straightforward to use the particle count in  
 390 comparison with the absolute mass concentration. We noted that there was little difference in OC-  
 391 Ca proportion during the periods of sea ice and without sea ice. The source of OC-Ca for the two  
 392 periods may be explained by the low wind-blown sea ice and the blowing-snow from Antarctica  
 393 (Fig. S1 and Table S1, the influence of air masses from Antarctic land, 40%), respectively. Another  
 394 reason for that may be the resuspension of OC-Ca. Also, bubble bursts within open water and leads  
 395 occurred in both periods.

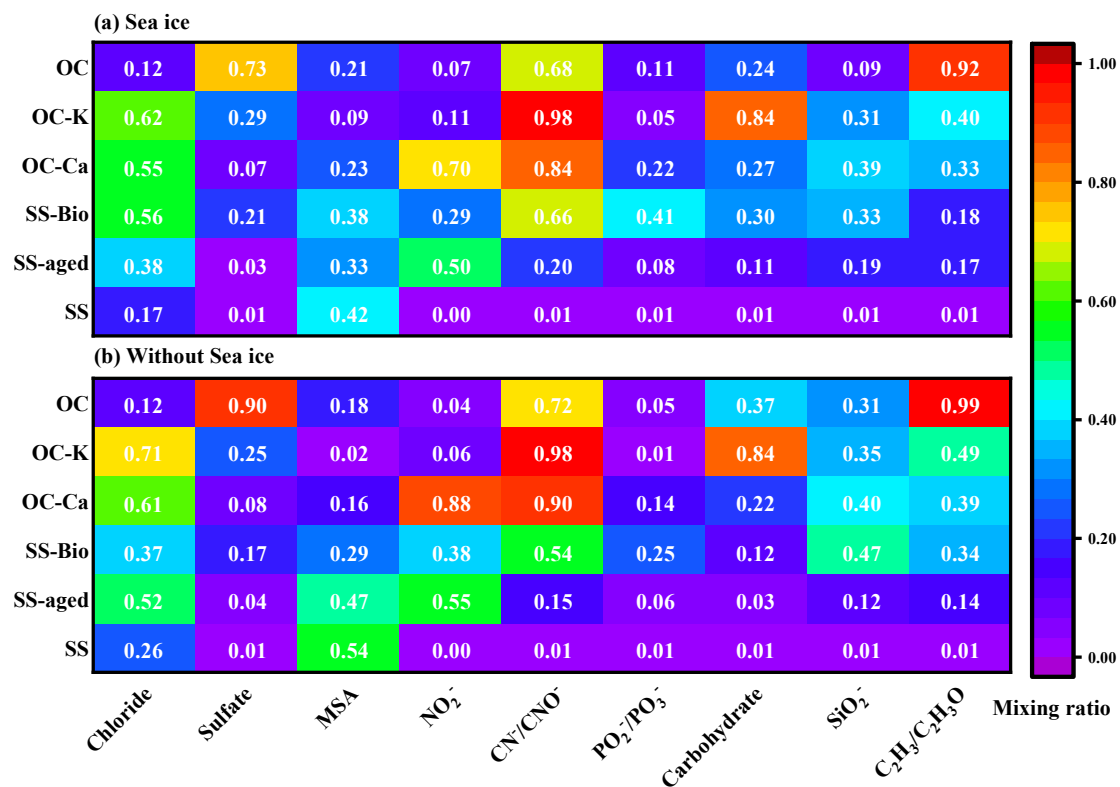

396

397 Figure S21

398 Hot plot of number fractions for major species of obtained single-particle types, including chloride

399 ( $m/z$  -35 and -37), sulfate ( $m/z$  -97), methanesulfonic acid (MSA,  $m/z$  -95), nitro-containing organic

400 species ( $m/z$  -46), organic nitrogen ( $m/z$  -26 or -42), phosphate ( $m/z$  -63 or -79), carbohydrate ( $m/z$

401 -45, -59, or -73), siliceous materials ( $m/z$  -60), and organic carbon ( $m/z$  -27 or 43). (a) leg I (sea ice

402 period) and leg II (period without sea ice).

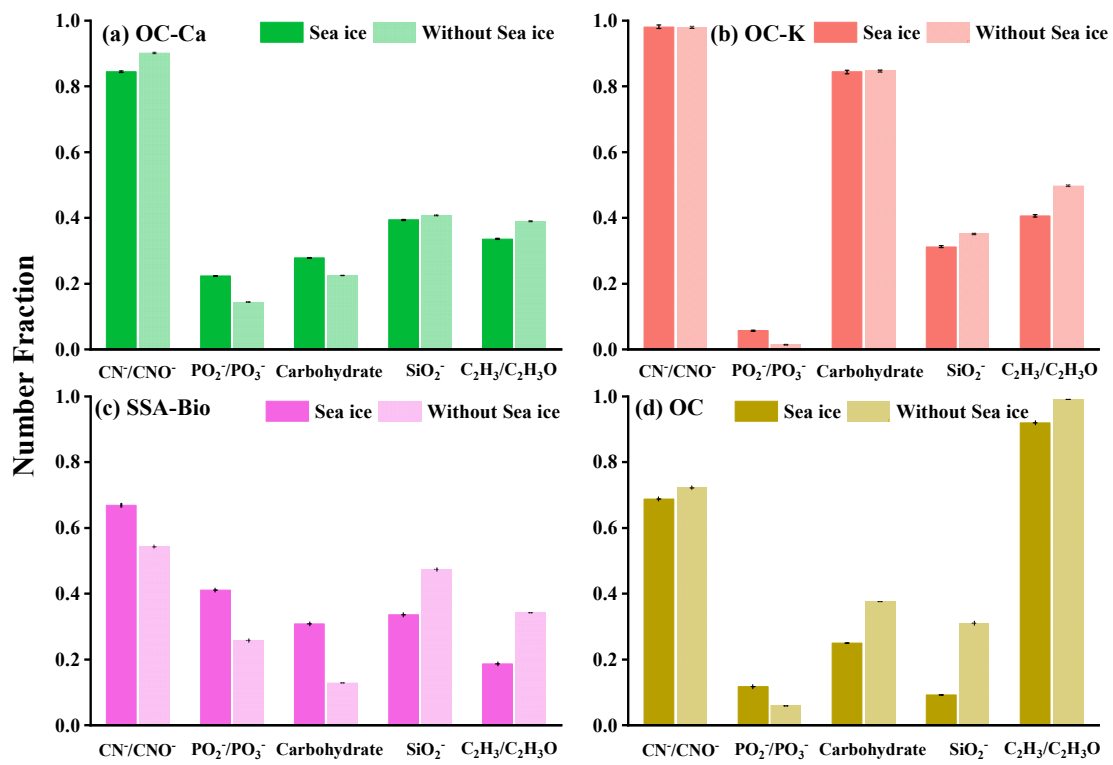

403

404 Figure S22

405 Comparison by number fractions for some typical organic chemical components of (a) OC-Ca, (b)

406 OC-K, and (c) SS-Bio during leg I (sea ice period) and leg II (period without Sea ice). The errors

407 are calculated assuming Poisson statistics for the obtained particles.

| no. | Methodology                                      | EF <sub>Ca</sub>                            | EF <sub>K</sub>                             | EF <sub>Mg</sub>                               | Ref.                    |
|-----|--------------------------------------------------|---------------------------------------------|---------------------------------------------|------------------------------------------------|-------------------------|
| 1   | Laboratory study (fresh and unfiltered seawater) | median = 1.21                               | n.a.                                        | n.a.                                           | Keene et al. (2007)     |
| 2   | Field study (Syowa Station, Antarctica)          | n.a.                                        | n.a.                                        | 1.35-1.55                                      | Hara et al. (2012)      |
| 3   | Field study (North Atlantic seawater)            | ~ 100 (45 nm)                               | ~ 5 (45 nm)                                 | ~ 2 (45 nm)                                    | Salter et al. (2016)    |
|     |                                                  | ~ 10 (80 nm)                                | ~ 1 (80 nm)                                 | ~ 1 (80 nm)                                    |                         |
|     |                                                  | ~ 4 (150 nm)                                | ~ 1 (150 nm)                                | ~ 1 (150 nm)                                   |                         |
|     |                                                  | ~ 2 (200 nm)                                | ~ 1 (200 nm)                                | ~ 1 (200 nm)                                   |                         |
|     |                                                  | ~ 1 (500 nm)                                | ~ 1 (500 nm)                                | ~ 1 (500 nm)                                   |                         |
| 4   | Laboratory study (Artificial seawater)           | ~ 50 (45 nm)                                | ~ 6 (45 nm)                                 | ~ 2 (45 nm)                                    | Salter et al. (2016)    |
|     |                                                  | ~ 10 (80 nm)                                | ~ 1 (80 nm)                                 | ~ 1 (80 nm)                                    |                         |
|     |                                                  | ~ 4 (150 nm)                                | ~ 1 (150 nm)                                | ~ 1 (150 nm)                                   |                         |
|     |                                                  | ~ 2.5 (200 nm)                              | ~ 1 (200 nm)                                | ~ 1 (200 nm)                                   |                         |
|     |                                                  | ~ 2 (500 nm)                                | ~ 1 (500 nm)                                | ~ 1 (500 nm)                                   |                         |
| 5   | Laboratory study (Artificial seawater)           | ~ 2 (1000 nm)                               | ~ 1 (1000 nm)                               | ~ 1 (1000 nm)                                  | Cochran et al. (2016)   |
|     |                                                  | ~ 5 (56 nm)                                 | ~ 1.2 (56 nm)                               | ~ 1.1 (56 nm)                                  |                         |
|     |                                                  | ~ 1.5 (100 nm)                              | ~ 0.3 (100 nm)                              | ~ 1 (100 nm)                                   |                         |
| 6   | Field study (Arctic Ocean)                       | median = 1.14                               | median = 0.72                               | median = 0.83                                  | Mukherjee et al. (2020) |
|     |                                                  | geometric mean = 3.7 (from 1.2 to 39)       | 1 - 8                                       | 0.1 - 1                                        |                         |
| 7   | Field study (the Ross Sea, Southern Ocean)       | 0.01 - 85,<br>median = 2.76,<br>mean = 1.18 | 0.20 - 75,<br>median = 3.61,<br>mean = 1.19 | 0.12 - 26.94,<br>median = 2.46,<br>mean = 1.48 | This study              |

n.a. refers that the value was unavailable.

Note: Enrichment factors of a specific species X with respect to sodium (EF<sub>X</sub>) are defined as the ratio of the mass concentration of a specific species X to the mass concentration of sodium in the particle to the same ratio in bulk seawater.

409 Table S1

410 A comparative analysis of enrichment factors of a specific species X (EF<sub>X</sub>, in which X indicates

411 Ca<sup>2+</sup>, K<sup>+</sup>, and Mg<sup>2+</sup>) with respect to sodium between previous studies and this study.

412

| <b>Item</b>                                    | <b>leg1<br/>(02.12.2017-<br/>20.12.2017)</b> | <b>leg2<br/>(13.01.2018-<br/>14.02.2018)</b> | <b>The whole observation</b> |
|------------------------------------------------|----------------------------------------------|----------------------------------------------|------------------------------|
| <b>Na (ng m<sup>-3</sup>)</b>                  | 306.72 ± 421.77                              | 395.84 ± 561.04                              | 364.64 ± 561.04              |
| <b>Ca (ng m<sup>-3</sup>)</b>                  | 24.54 ± 41.28                                | 19.38 ± 30.80                                | 21.20 ± 34.96                |
| <b>K (ng m<sup>-3</sup>)</b>                   | 11.39 ± 7.33                                 | 8.72 ± 17.65                                 | 9.54 ± 15.28                 |
| <b>Mg (ng m<sup>-3</sup>)</b>                  | 50.63 ± 48.67                                | 59.61 ± 88.89                                | 56.59 ± 77.47                |
| <b>Cl (ng m<sup>-3</sup>)</b>                  | 18.16 ± 22.18                                | 26.57 ± 36.85                                | 23.63 ± 32.74                |
| <b>EF<sub>Ca</sub></b>                         | 3.94 ± 8.50                                  | 2.11 ± 4.47                                  | 2.76 ± 6.27                  |
| <b>Positive calcium enrichment event (%)</b>   | 71.0%                                        | 47.7%                                        | 56.0%                        |
| <b>EF<sub>K</sub></b>                          | 7.93 ± 14.03                                 | 1.67 ± 1.69                                  | 3.61 ± 8.45                  |
| <b>Positive potassium enrichment event (%)</b> | 67.9%                                        | 54.2%                                        | 58.4%                        |
| <b>EF<sub>Mg</sub></b>                         | 3.74 ± 3.75                                  | 1.80 ± 1.05                                  | 2.46 ± 2.53                  |
| <b>Positive magnesium enrichment event (%)</b> | 99.0%                                        | 95.2%                                        | 96.3%                        |
| <b>Temperature (°C)</b>                        | -4.1 ± 1.4                                   | -3.2 ± 2.2                                   | -3.5 ± 2.0                   |
| <b>Wind speed (m s<sup>-1</sup>)</b>           | 7.2 ± 5.5                                    | 7.1 ± 4.2                                    | 7.1 ± 4.7                    |
| <b>Sea ice fraction</b>                        | 64.91 ± 5.57                                 | 54.59 ± 0.08                                 | 58.38 ± 6.07                 |
| <b>ChI-a concentration (µg L<sup>-1</sup>)</b> | 0.51 ± 0.29                                  | 0.44 ± 0.18                                  | 0.46 ± 0.23                  |
| <b>72-Trajectory coverage (%)</b>              |                                              |                                              |                              |
| <b>Sea ice:</b>                                | 78%                                          | 28%                                          | 48%                          |
| <b>Open water:</b>                             | 6%                                           | 32%                                          | 21%                          |
| <b>Antarctic Land:</b>                         | 16%                                          | 40%                                          | 31%                          |

Note: During the leg I, the sea ice was retreat. During the leg II, almost no sea ice coverage is equivalent to the sea ice fraction below 55.

413

414 Table S2

415 Average measured ion mass concentrations, enrichment factors for specific cations, and

416 metrological parameters for leg I and leg II.

| Particle types | Major peaks                                                                                                                                                                  | Particle count                      |                                     | Total particle count |
|----------------|------------------------------------------------------------------------------------------------------------------------------------------------------------------------------|-------------------------------------|-------------------------------------|----------------------|
|                |                                                                                                                                                                              | leg1<br>(02.12.2017-<br>20.12.2017) | leg2<br>(13.01.2018-<br>14.02.2018) |                      |
| SSA            | [Na] <sup>+</sup> , [Na <sub>2</sub> ] <sup>+</sup> , [Na <sub>2</sub> Cl] <sup>+</sup> , [Mg] <sup>2+</sup> , [K] <sup>+</sup> , [Ca] <sup>2+</sup> , and [Cl] <sup>-</sup> | 69982                               | 71930                               | 141912               |
| SSA-aged       | Inorganic salt signature and nitrate of [NO <sub>2</sub> ] <sup>-</sup> and [NO <sub>3</sub> ] <sup>-</sup>                                                                  | 36905                               | 32741                               | 69646                |
| SSA-Bio        | Inorganic salt signature and organic matter signals                                                                                                                          | 5489                                | 21276                               | 26765                |
| OC-Ca          | [Ca] <sup>2+</sup> and organic matter signals                                                                                                                                | 134653                              | 284861                              | 419514               |
| OC-K           | [K] <sup>+</sup> and organic matter signals                                                                                                                                  | 29734                               | 88549                               | 118283               |
| OC             | Organic matter signals                                                                                                                                                       | 16980                               | 88549                               | 105529               |
| EC             | Element carbon with m/z ±C <sub>n</sub> , n = 1 - 6                                                                                                                          | 9515                                | 15036                               | 24551                |

Inorganic salt signatures: [Na]<sup>+</sup>, [Na<sub>2</sub>]<sup>+</sup>, [Na<sub>2</sub>Cl]<sup>+</sup>, [Mg]<sup>2+</sup>, [K]<sup>+</sup>, [Ca]<sup>2+</sup>, and [Cl]<sup>-</sup>.

Organic matter signals: organic nitrogen ([CN]<sup>-</sup> and [CNO]<sup>-</sup>), phosphate ([PO<sub>2</sub>]<sup>-</sup> and [PO<sub>3</sub>]<sup>-</sup>), carbohydrate ([CHO<sub>2</sub>]<sup>-</sup>, [C<sub>2</sub>H<sub>3</sub>O<sub>2</sub>]<sup>-</sup>, and [C<sub>3</sub>H<sub>5</sub>O<sub>2</sub>]<sup>-</sup>), siliceous materials ([SiO<sub>2</sub>]<sup>-</sup>), and organic carbon ([C<sub>2</sub>H<sub>3</sub>]<sup>+</sup> and [C<sub>2</sub>H<sub>3</sub>O<sub>3</sub>]<sup>+</sup>).

417

418 Table S3

419 Particle counts and characteristic peaks for the seven single-particle chemical classes obtained

420 during cruise observations.

| Item                                      | Area 1<br>(2018.02.08 19:00-<br>2017.02.10 18:00) | Area 2<br>(2018.01.22 16:00-<br>2018.01.24 01:00) | Area 3<br>(2017.12.02 07:00-<br>2017.12.04 19:00) | Area 4<br>(2017.12.05 00:00-<br>2017.12.05 23:00) | Area 5<br>(2017.12.18 20:00-2017.12.19<br>03:00) | leg I        | leg II       | The whole<br>observation |
|-------------------------------------------|---------------------------------------------------|---------------------------------------------------|---------------------------------------------------|---------------------------------------------------|--------------------------------------------------|--------------|--------------|--------------------------|
| EF <sub>Ca</sub>                          | 10.73 ± 13.63                                     | 3.98 ± 1.84                                       | 5.47 ± 4.64                                       | 9.72 ± 18.75                                      | 30.98 ± 31.32                                    | 3.94 ± 8.50  | 2.11 ± 4.47  | 2.76 ± 6.27              |
| EF <sub>K</sub>                           | 2.88 ± 2.36                                       | 1.72 ± 0.79                                       | n.a.                                              | 45.46 ± 14.79                                     | 1.22 ± 0.46                                      | 7.93 ± 14.03 | 1.67 ± 1.69  | 3.61 ± 8.45              |
| EF <sub>Mg</sub>                          | 2.88 ± 1.54                                       | 2.24 ± 0.63                                       | 7.89 ± 4.35                                       | 8.25 ± 2.90                                       | 1.38 ± 0.33                                      | 3.74 ± 3.75  | 1.80 ± 1.05  | 2.46 ± 2.53              |
| Temperature (°C)                          | -6.4 ± 1.2                                        | -2.8 ± 0.6                                        | -4.5 ± 0.9                                        | -4.0 ± 0.8                                        | -1.9 ± 2.2                                       | -4.1 ± 1.4   | -3.2 ± 2.2   | -3.5 ± 2.0               |
| Wind speed (m s <sup>-1</sup> )           | 5.7 ± 3.5                                         | 4.5 ± 1.9                                         | 6.04 ± 2.2                                        | 2.49 ± 1.1                                        | 5.1 ± 4.5                                        | 7.2 ± 5.5    | 7.1 ± 4.2    | 7.1 ± 4.7                |
| Sea ice fraction                          | 54.60 ± 0.02                                      | 54.53 ± 0.00                                      | 74.28 ± 1.41                                      | 71.41                                             | 58.06 ± 0.25                                     | 64.91 ± 5.57 | 54.59 ± 0.08 | 58.38 ± 6.07             |
| Chl-a concentration (µg L <sup>-1</sup> ) | 0.99 ± 1.65                                       | 0.10 ± 0.20                                       | Unavailable                                       | Unavailable                                       | Unavailable                                      | 0.51 ± 0.29  | 0.44 ± 0.18  | 0.46 ± 0.23              |
| 72-Trajectory coverage (%)*               |                                                   |                                                   |                                                   |                                                   |                                                  |              |              |                          |
| Sea ice:                                  | 2%                                                | 1%                                                | 100%                                              | 100%                                              | 76%                                              | 78%          | 28%          | 48%                      |
| Open water:                               | 0%                                                | 0%                                                | 0%                                                | 0%                                                | 22%                                              | 6%           | 32%          | 21%                      |
| Antarctic Land:                           | 98%                                               | 99%                                               | 0%                                                | 0%                                                | 2%                                               | 16%          | 40%          | 31%                      |

Note: (1) Area 1 and 2 are divided during the leg II, whereas the Area 3, 4, and 5 are divided during the leg I. (2) The values of sea ice intensity and chl-a concentration present with daily resolution. Others present with hourly resolution. (3) No sea ice coverage is equivalent to the sea ice fraction below 55. (4) 72-Trajectory coverage (%)\* corresponds to fraction of air masses traveled over different surface type when the peak EFCa value from Area 1 to 5. For leg I, II, and the whole observation, this fraction was calculated with daily resolution.

421

422 Table S4

423 Average enrichment factors for specific cations and metrological parameters over the different areas

424 mentioned in Fig. S7. Although all of these areas exhibited significant Ca<sup>2+</sup> enrichment in SSAs,

425 they may have varied due to synergetic environmental factors rather than a single factor. Ca<sup>2+</sup>

426 enrichment in SSA was notably observed with low wind speed, underscoring the effect of wind

427 speed. The back trajectories are labeled as sea ice, open water, and land, disregarding periods that

428 the air mass spent above the mixed layer height.

429 For the leg I, the major positive Ca<sup>2+</sup> enrichment events were associated with Areas 3, 4, and 5. In

430 addition to the lower wind speed, lower temperature, and the presence of sea ice, the air masses

431 blew over the large fraction of sea-ice-covered ocean may play an important role in Ca<sup>2+</sup> enrichment.

432 For the leg II, the major positive Ca<sup>2+</sup> enrichment events were occurred in Areas 1 and 2, which

433 mainly associated with lower wind speed and temperature. The air masses were mostly from the

434 snow-covered Antarctic land.

435



| EF <sub>Ca</sub> | Count (Correlation coefficient, r) |               |       |                   | Peak area (Correlation coefficient, r, <i>m/z</i> 40 [Ca] <sup>2+</sup> ) |               |       |       |
|------------------|------------------------------------|---------------|-------|-------------------|---------------------------------------------------------------------------|---------------|-------|-------|
|                  | OC-Ca-Inorganic                    | OC-Ca-Organic | OC-Ca | SS-Ca             | OC-Ca-Inorganic                                                           | OC-Ca-Organic | OC-Ca | SS-Ca |
| 0 - 5            | 0.08                               | 0.31          | 0.18  | 0.07              | 0.18                                                                      | 0.44          | 0.41  | 0.04  |
| 5 - 10           | 0.15                               | 0.37          | 0.27  | 0.04              | 0.14                                                                      | 0.36          | 0.33  | 0.06  |
| > 10             | 0.58                               | 0.59          | 0.63  | 0.10 <sup>a</sup> | 0.53                                                                      | 0.68          | 0.68  | 0.10  |
| <b>Total</b>     | 0.28                               | 0.51          | 0.42  | 0.21              | 0.31                                                                      | 0.51          | 0.49  | 0.03  |

a: *p*-value > 0.05

436

437 Table S5

438 Correlation analysis between the OC-Ca (by count and by peak area of *m/z* 40 [Ca]<sup>+</sup>) and its two

439 subpopulations OC-Ca-Organic and OC-Ca-Inorganic, SS-Ca (by count and by peak area of *m/z* 40

440 [Ca]<sup>+</sup>), and mass concentration of Ca<sup>2+</sup> in the variation of EF<sub>Ca</sub>, with the *p*-value < 0.05.

441

442 **References**

- 443 Boreddy, S. K. R. and Kawamura, K.: A 12-year observation of water-soluble ions in TSP aerosols  
444 collected at a remote marine location in the western North Pacific: an outflow region of Asian dust,  
445 *Atmos Chem Phys*, 15, 6437-6453, <https://doi.org/10.5194/acp-15-6437-2015>, 2015.
- 446 Cochran, R. E., Jayarathne, T., Stone, E. A., and Grassian, V. H.: Selectivity Across the Interface: A Test  
447 of Surface Activity in the Composition of Organic-Enriched Aerosols from Bubble Bursting, *J Phys*  
448 *Chem Lett*, 7, 1692-1696, <https://doi.org/10.1021/acs.jpcclett.6b00489>, 2016.
- 449 Cochran, R. E., Laskina, O., Trueblood, J. V., Estillore, A. D., Morris, H. S., Jayarathne, T., Sultana, C.  
450 M., Lee, C., Lin, P., Laskin, J., Laskin, A., Dowling, J. A., Qin, Z., Cappa, C. D., Bertram, T. H.,  
451 Tivanski, A. V., Stone, E. A., Prather, K. A., and Grassian, V. H.: Molecular Diversity of Sea Spray  
452 Aerosol Particles: Impact of Ocean Biology on Particle Composition and Hygroscopicity, *Chem.*, 2,  
453 655-667, <https://doi.org/10.1016/j.chempr.2017.03.007>, 2017.
- 454 Collins, D. B., Zhao, D. F., Ruppel, M. J., Laskina, O., Grandquist, J. R., Modini, R. L., Stokes, M. D.,  
455 Russell, L. M., Bertram, T. H., Grassian, V. H., Deane, G. B., and Prather, K. A.: Direct aerosol  
456 chemical composition measurements to evaluate the physicochemical differences between  
457 controlled sea spray aerosol generation schemes, *Atmos Meas Tech*, 7, 3667-3683,  
458 <https://doi.org/10.5194/amt-7-3667-2014>, 2014.
- 459 Facchini, M. C., Rinaldi, M., Decesari, S., Carbone, C., Finessi, E., Mircea, M., Fuzzi, S., Ceburnis, D.,  
460 Flanagan, R., Nilsson, E. D., de Leeuw, G., Martino, M., Woeltjen, J., and O'Dowd, C. D.: Primary  
461 submicron marine aerosol dominated by insoluble organic colloids and aggregates, *Geophys Res*  
462 *Lett*, 35<https://doi.org/10.1029/2008gl034210>, 2008.
- 463 Gaston, C. J., Furutani, H., Guazzotti, S. A., Coffee, K. R., Bates, T. S., Quinn, P. K., Aluwihare, L. I.,  
464 Mitchell, B. G., and Prather, K. A.: Unique ocean-derived particles serve as a proxy for changes in  
465 ocean chemistry, *Journal of Geophysical Research: Atmospheres*,  
466 116<https://doi.org/10.1029/2010jd015289>, 2011.
- 467 Gross, D. S., Galli, M. E., Silva, P. J., and Prather, K. A.: Relative sensitivity factors for alkali metal and  
468 ammonium cations in single particle aerosol time-of-flight mass spectra, *Anal Chem*, 72, 416-422,  
469 <https://doi.org/10.1021/ac990434g>, 2000.
- 470 Guasco, T. L., Cuadra-Rodriguez, L. A., Pedler, B. E., Ault, A. P., Collins, D. B., Zhao, D. F., Kim, M.  
471 J., Ruppel, M. J., Wilson, S. C., Pomeroy, R. S., Grassian, V. H., Azam, F., Bertram, T. H., and  
472 Prather, K. A.: Transition Metal Associations with Primary Biological Particles in Sea Spray Aerosol  
473 Generated in a Wave Channel, *Environ Sci Technol*, 48, 1324-1333,  
474 <https://doi.org/10.1021/es403203d>, 2014.
- 475 Hara, K., Osada, K., Yabuki, M., and Yamanouchi, T.: Seasonal variation of fractionated sea-salt particles  
476 on the Antarctic coast, *Geophys Res Lett*, 39<https://doi.org/10.1029/2012gl052761>, 2012.
- 477 Healy, R. M., Sciare, J., Poulain, L., Kamili, K., Merkel, M., Muller, T., Wiedensohler, A., Eckhardt, S.,  
478 Stohl, A., Sarda-Estevé, R., McGillicuddy, E., O'Connor, I. P., Sodeau, J. R., and Wenger, J. C.:  
479 Sources and mixing state of size-resolved elemental carbon particles in a European megacity: Paris,  
480 *Atmos Chem Phys*, 12, 1681-1700, <https://doi.org/10.5194/acp-12-1681-2012>, 2012.
- 481 Keene, W. C., Maring, H., Maben, J. R., Kieber, D. J., Pszenny, A. A. P., Dahl, E. E., Izaguirre, M. A.,  
482 Davis, A. J., Long, M. S., Zhou, X. L., Smoydzin, L., and Sander, R.: Chemical and physical  
483 characteristics of nascent aerosols produced by bursting bubbles at a model air-sea interface, *Journal*  
484 *of Geophysical Research: Atmospheres*, 112<https://doi.org/10.1029/2007jd008464>, 2007.

485 Leck, C. and Bigg, E. K.: New Particle Formation of Marine Biological Origin, *Aerosol Sci Tech*, 44,  
486 570-577, <https://doi.org/10.1080/02786826.2010.481222>, 2010.

487 Li, L., Huang, Z., Dong, J., Li, M., Gao, W., Nian, H., Fu, Z., Zhang, G., Bi, X., Cheng, P., and Zhou, Z.:  
488 Real time bipolar time-of-flight mass spectrometer for analyzing single aerosol particles, *Int J Mass*  
489 *Spectrom*, 303, 118-124, <https://doi.org/10.1016/j.ijms.2011.01.017>, 2011.

490 Lundberg, S. M., Erion, G., Chen, H., DeGrave, A., Prutkin, J. M., Nair, B., Katz, R., Himmelfarb, J.,  
491 Bansal, N., and Lee, S. I.: From local explanations to global understanding with explainable AI for  
492 trees, *Nat Mach Intell*, 2, 56-67, <https://doi.org/10.1038/s42256-019-0138-9>, 2020.

493 Mukherjee, P., Reinfeldt, J. R., and Gao, Y.: Enrichment of calcium in sea spray aerosol in the Arctic  
494 summer atmosphere, *Mar Chem*, 227 <https://doi.org/10.1016/j.marchem.2020.103898>, 2020.

495 Oppo, C., Bellandi, S., Innocenti, N. D., Stortini, A. M., Loglio, G., Schiavuta, E., and Cini, R.: Surfactant  
496 components of marine organic matter as agents for biogeochemical fractionation and pollutant  
497 transport via marine aerosols, *Mar Chem*, 63, 235-253, [https://doi.org/10.1016/S0304-](https://doi.org/10.1016/S0304-4203(98)00065-6)  
498 [4203\(98\)00065-6](https://doi.org/10.1016/S0304-4203(98)00065-6), 1999.

499 Orellana, M. V. and Verdugo, P.: Ultraviolet radiation blocks the organic carbon exchange between the  
500 dissolved phase and the gel phase in the ocean, *Limnol Oceanogr*, 48, 1618-1623,  
501 <https://doi.org/10.4319/lo.2003.48.4.1618>, 2003.

502 Orellana, M. V., Matrai, P. A., Leck, C., Rauschenberg, C. D., Lee, A. M., and Coz, E.: Marine microgels  
503 as a source of cloud condensation nuclei in the high Arctic, *P Natl Acad Sci USA*, 108, 13612-13617,  
504 <https://doi.org/10.1073/pnas.1102457108>, 2011.

505 Prather, K. A., Bertram, T. H., Grassian, V. H., Deane, G. B., Stokes, M. D., DeMott, P. J., Aluwihare, L.  
506 I., Palenik, B. P., Azam, F., Seinfeld, J. H., Moffet, R. C., Molina, M. J., Cappa, C. D., Geiger, F. M.,  
507 Roberts, G. C., Russell, L. M., Ault, A. P., Baltrusaitis, J., Collins, D. B., Corrigan, C. E., Cuadra-  
508 Rodriguez, L. A., Ebben, C. J., Forestieri, S. D., Guasco, T. L., Hersey, S. P., Kim, M. J., Lambert,  
509 W. F., Modini, R. L., Mui, W., Pedler, B. E., Ruppel, M. J., Ryder, O. S., Schoepp, N. G., Sullivan,  
510 R. C., and Zhao, D. F.: Bringing the ocean into the laboratory to probe the chemical complexity of  
511 sea spray aerosol, *P Natl Acad Sci USA*, 110, 7550-7555, <https://doi.org/10.1073/pnas.1300262110>,  
512 2013.

513 Pratt, K. A. and Prather, K. A.: Mass spectrometry of atmospheric aerosolsuRecent developments and  
514 applications. Part II: On-line mass spectrometry techniques, *Mass Spectrom Rev*, 31, 17-48,  
515 <https://doi.org/10.1002/mas.20330>, 2012.

516 Qin, X. Y., Bhave, P. V., and Prather, K. A.: Comparison of two methods for obtaining quantitative mass  
517 concentrations from aerosol time-of-flight mass spectrometry measurements, *Anal Chem*, 78, 6169-  
518 6178, <https://doi.org/10.1021/ac060395q>, 2006.

519 Quinn, P. K., Collins, D. B., Grassian, V. H., Prather, K. A., and Bates, T. S.: Chemistry and Related  
520 Properties of Freshly Emitted Sea Spray Aerosol, *Chem Rev*, 115, 4383-4399,  
521 <https://doi.org/10.1021/cr500713g>, 2015.

522 Salter, M. E., Hamacher-Barth, E., Leck, C., Werner, J., Johnson, C. M., Riipinen, I., Nilsson, E. D., and  
523 Zieger, P.: Calcium enrichment in sea spray aerosol particles, *Geophys Res Lett*, 43, 8277-8285,  
524 <https://doi.org/10.1002/2016gl070275>, 2016.

525 Schill, S. R., Collins, D. B., Lee, C., Morris, H. S., Novak, G. A., Prather, K. A., Quinn, P. K., Sultana,  
526 C. M., Tivanski, A. V., Zimmermann, K., Cappa, C. D., and Bertram, T. H.: The Impact of Aerosol  
527 Particle Mixing State on the Hygroscopicity of Sea Spray Aerosol, *Acs Central Sci*, 1, 132-141,  
528 <https://doi.org/10.1021/acscentsci.5b00174>, 2015.

529 Schlitzer, R.: Interactive analysis and visualization of geoscience data with Ocean Data View, *Comput*  
530 *Geosci-Uk*, 28, 1211-1218, [https://doi.org/10.1016/S0098-3004\(02\)00040-7](https://doi.org/10.1016/S0098-3004(02)00040-7), 2002.

531 Sierau, B., Chang, R. Y. W., Leck, C., Paatero, J., and Lohmann, U.: Single-particle characterization of  
532 the high-Arctic summertime aerosol, *Atmos Chem Phys*, 14, 7409-7430,  
533 <https://doi.org/10.5194/acp-14-7409-2014>, 2014.

534 Song, C., Becagli, S., Beddows, D. C. S., Brean, J., Browse, J., Dai, Q., Dall'Osto, M., Ferracci, V.,  
535 Harrison, R. M., Harris, N., Li, W., Jones, A. E., Kirchgäßner, A., Kramawijaya, A. G., Kurganskiy,  
536 A., Lupi, A., Mazzola, M., Severi, M., Traversi, R., and Shi, Z.: Understanding Sources and Drivers  
537 of Size-Resolved Aerosol in the High Arctic Islands of Svalbard Using a Receptor Model Coupled  
538 with Machine Learning, *Environ Sci Technol*, 56, 11189-11198,  
539 <https://doi.org/10.1021/acs.est.1c07796>, 2022.

540 Su, B., Wang, T., Zhang, G., Liang, Y., Lv, C., Hu, Y., Li, L., Zhou, Z., Wang, X., and Bi, X.: A review  
541 of atmospheric aging of sea spray aerosols: Potential factors affecting chloride depletion, *Atmos*  
542 *Environ*, 290 <https://doi.org/10.1016/j.atmosenv.2022.119365>, 2022.

543 Su, B. J., Zhang, G. H., Zhuo, Z. M., Xie, Q. H., Du, X. B., Fu, Y. Z., Wu, S., Huang, F. G., Bi, X. H., Li,  
544 X., Li, L., and Zhou, Z.: Different characteristics of individual particles from light-duty diesel  
545 vehicle at the launching and idling state by AAC-SPAMS, *Journal of Hazardous Materials*,  
546 418 <https://doi.org/10.1016/j.jhazmat.2021.126304>, 2021a.

547 Su, B. J., Zhuo, Z. M., Fu, Y. Z., Sun, W., Chen, Y., Du, X. B., Yang, Y. X., Wu, S., Xie, Q. H., Huang, F.  
548 G., Chen, D. H., Li, L., Zhang, G. H., Bi, X. H., and Zhou, Z.: Individual particle investigation on  
549 the chloride depletion of inland transported sea spray aerosols during East Asian summer monsoon,  
550 *Sci Total Environ*, 765 <https://doi.org/10.1016/j.scitotenv.2020.144290>, 2021b.

551 Yan, J., Jung, J., Lin, Q., Zhang, M., Xu, S., and Zhao, S.: Effect of sea ice retreat on marine aerosol  
552 emissions in the Southern Ocean, Antarctica, *Sci Total Environ*, 745, 140773,  
553 <https://doi.org/10.1016/j.scitotenv.2020.140773>, 2020a.

554 Yan, J., Jung, J., Zhang, M., Xu, S., Lin, Q., Zhao, S., and Chen, L.: Significant Underestimation of  
555 Gaseous Methanesulfonic Acid (MSA) over Southern Ocean, *Environ Sci Technol*, 53, 13064-13070,  
556 <https://doi.org/10.1021/acs.est.9b05362>, 2019.

557 Yan, J., Jung, J., Zhang, M., Bianchi, F., Tham, Y., Xu, S., Lin, Q., Zhao, S., Li, L., and Chen, L.: Uptake  
558 selectivity of methanesulfonic acid (MSA) on fine particles over polynya regions of the Ross Sea,  
559 Antarctica, *Atmos Chem Phys*, 20, 3259-3271, <https://doi.org/10.5194/acp-20-3259-2020>, 2020b.

560 Zhang, G., Fu, Y., Peng, X., Sun, W., Shi, Z., Song, W., Hu, W., Chen, D., Lian, X., Li, L., Tang, M.,  
561 Wang, X., and Bi, X.: Black Carbon Involved Photochemistry Enhances the Formation of Sulfate in  
562 the Ambient Atmosphere: Evidence From In Situ Individual Particle Investigation, *Journal of*  
563 *Geophysical Research: Atmospheres*, 126 <https://doi.org/10.1029/2021jd035226>, 2021.

564
