# Supplementary material for: Enrichment of calcium in sea spray aerosol through bulk measurements and individual particle analysis during the R/V Xuelong cruise over the Ross Sea, Antarctica
Source: Copernicus journal article supplement (doi:10.5194/egusphere-2023-322), 2023-03-24
Supplement: Supplementary file [file egusphere-2023-322-AC2-supplement.pdf]

1 Response to reviewer #2 comment on EGUSPHERE-2023-322 of Enrichment of calcium in sea  
2 spray aerosol through bulk measurements and individual particle analysis during the R/V Xuelong  
3 cruise over the Ross Sea, Antarctica

4 We would like to thank the reviewers for their valuable time, feedback, and comments. The  
5 suggested modifications have certainly improved the manuscript.

6 In this document, the review comments are shown in black. The author's response is shown in blue.  
7 The revision is shown in red. Line numbers in the responses correspond to the revised manuscript  
8 with tracked change. All modifications can be found in the revised manuscript with tracked changes.

9  
10 This manuscripts present data on Ca enrichment in sea spray aerosol. This is an interesting topic in  
11 atmospheric research because of the CCN activation of sea spray aerosol particles. The mechanism  
12 of Ca enrichment is not yet fully understood. The data set itself (from a ship cruise at Antarctica) is  
13 rare and valuable.

14  
15 However, there are some weaknesses in the presentation and interpretation of the results. Especially  
16 the single particle results are presented as measured, but connection to the main question (i.e. the  
17 mechanism behind the Ca enrichment) is not made clear. I don't think that it is unexpected that Ca  
18 and organics are internally mixed in sea spray particles. However, how the organic Ca helps to  
19 explain the Ca enrichment is not clear to me.

20  
21 Thus, I think that there are major revisions necessary before the manuscript can be accepted for ACP.

22  
23 My comments and concerns are listed in the following:

24  
25 Author's Response: We would like to express our gratitude to the anonymous reviewer for the  
26 thorough review of our manuscript and for providing insightful comments that have significantly  
27 contributed to its quality.

28 To better understand calcium enrichment in sea spray aerosols (SSAs), it is necessary to verify  
29 the chemical form of calcium. This is because the current water-soluble estimation of  $\text{Ca}^{2+}$   
30 enrichment in SSAs may be inaccurate without considering organically complexed calcium. Thus,  
31 we believe that single-particle analysis is a crucial aspect of comprehending the mechanism of  
32 calcium enrichment in SSAs. In this study, we identified a single-particle type that calcium  
33 internally mixed with organics (i.e., OC-Ca). It should be noted that OC-Ca is not equal to organic  
34 Ca. Although we cannot directly identify the chemical form of calcium via SPAMS, we rigorously  
35 inferred that OC-Ca may be organically complexed calcium based on its specific mixing state and  
36 thus be partially water-soluble.

37 We attempted to explain the mechanisms of calcium enrichment in SSAs by establishing a  
38 relationship between IGAC and SPAMS datasets. Initially, we found calcium enrichment in ambient  
39 aerosol samples in the Ross Sea, which we hypothesize is associated with several environmental

40 variables, such as sea ice fraction, ambient temperature, and wind speed. Then, we attempted to  
41 investigate which particle types of calcareous aerosol contribute to calcium enrichment by  
42 comparing the chemical composition (e.g., the peak intensity of Ca), mixing state, and size of  
43 individual aerosols using SPAMS, as well as the absolute mass concentration using IGAC. Our  
44 results suggested that a single-particle type of OC-Ca (internally mixed organics with calcium) may  
45 partially contribute to calcium enrichment in SSAs.

46 Based on a theory of strong coordination between  $\text{Ca}^{2+}$  and organic matter and the specific  
47 mixing state of OC-Ca observed in the Ross Sea, we further infer that the production mechanism of  
48 OC-Ca may be associated with marine microgels. Therefore, a comprehensive understanding of the  
49 characteristics of OC-Ca behind the mechanisms of calcium enrichment is conducive to further  
50 recognizing the CCN and IN activation in remote marine areas.

51 Detailed point-by-point responses are as follows:

52

53 General comments

54

55 1. Manuscript structure:

56

57 The main text of the manuscript is rather short. Many of the important and interesting discussions  
58 regarding methods and uncertainties are only found in the supplement. This is unusual for an ACP  
59 manuscript and make me suspect that the manuscript had been originally submitted somewhere else.  
60 Author's Response: Thanks for the reviewer's comment. We would like to clarify that this  
61 manuscript has undergone extensive revision before submission to Atmospheric Chemistry and  
62 Physics. And we are sorry for the unclear. To improve writing structure and readability, we have  
63 incorporated the following parts into the main text, as suggested by reviewer 1# and reviewer 2#.

64 By incorporating these additions, we believe that the revised manuscript has achieved a more  
65 comprehensive and cohesive structure, and we thank the reviewer for their helpful input in this  
66 regard.

67

68 I recommend moving the following parts of the supplement into the main text:

69

70 S1: merge with section 4

71 Author's Response: Thanks for the reviewer's constructive suggestion. We have incorporated Text  
72 S1 into Section 2.4.1 Aerosol water-soluble ion constituents, Section 4 Discussion, and Section 5  
73 Conclusions and atmospheric implications.

74

75 S2: merge with section 2.3

76 Author's Response: We have incorporated Text S2 into Section 2.4.

77

78 from S3: lines 123 to 141: move to section 4

79 [Author's Response:](#) We have revised the manuscript as suggested. Please refer to the ending of  
80 section 4 Discussion (Lines 475-510).

81  
82 S6: move to section 3.2

83 [Author's Response:](#) Thanks for the reviewer's constructive suggestion. Some of the content in Text  
84 S6 (lines 211-236) has been present in the original main text (lines 267-305 in Section 4). Therefore,  
85 we incorporated lines 203-210 into the beginning of Section 3.1.

86 We propose that both  $\text{Na}^+$  and  $\text{Ca}^{2+}$  in our observations originated from marine sources. The  
87 mass concentration of  $\text{Na}^+$  exhibited a strong positive correlation with that of  $\text{Cl}^-$  ( $r = 0.99, p < 0.001$ )  
88 and  $\text{Mg}^{2+}$  ( $r = 0.99, p < 0.001$ ) (**Fig. S6**), indicating that they had a common origin (i.e., sea spray).  
89 However, it is not surprising that the mass concentration of  $\text{Na}^+$  showed a relatively weak correlation  
90 with that of  $\text{Ca}^{2+}$  ( $r = 0.51, p < 0.001$ ) (**Fig. S6**). This can be explained by the low water-soluble  
91 complexation of  $\text{Ca}^{2+}$  with organic matter and/or insoluble  $\text{Ca}^{2+}$  in the form of calcareous shell  
92 debris, such as  $\text{CaCO}_3$ . In addition, the potential impact of long-range transport of anthropogenic  
93 aerosols and dust contributing to  $\text{Ca}^{2+}$  may be limited due to the predominance of polar air masses  
94 during the observation campaigns (see **Fig. S1**).

95  
96 S8: move to main text, maybe as an additionally results subsection

97 [Author's Response:](#) Thanks for the reviewer's suggestion. We have carefully considered the results  
98 that there is little difference between leg I and leg II regarding the chemical composition, size, and  
99 mixing state of OC-Ca particles. Therefore, we hope to keep this part in the supporting information.  
100 Also, we give a summary of this part in the end Section 2.4.2 Single-particle analysis.

101 There was little difference in individual particle analysis regarding chemical composition, size,  
102 and mixing state of particle clusters obtained from leg I and leg II (SI Text S3).

103 Taken together, we believe that these additions have significantly enhanced the clarity and  
104 organization of our manuscript and would like to express our appreciation to the reviewer for their  
105 helpful suggestion. Please refer to the revised manuscript for more details.

106  
107 2. Calcium enrichment:

108  
109 It is known that calcium is enriched in sea spray. The data from the IGAC instrument confirm this  
110 nicely. The results show that the highest enrichment factors are found at low temperate, low wind  
111 speed and sea ice conditions. This is a solid result, but I am no expert in this field and can not judge  
112 whether this is new or not.

113 [Author's Response:](#) Thanks for the reviewer's comments.

114 Calcium enrichment in SSAs has been compellingly verified in previous studies. We provided  
115 a summary of recent advances in calcium enrichment in SSAs in Table S1. These studies indeed  
116 demonstrated the presence of calcium enrichment in SSAs, but they have not established a clear  
117 relationship between calcium enrichment and various environmental factors.

118 In this study, we discussed how specific environmental factors affect calcium enrichment  
119 through field observations. We believe that these interesting findings could provide a better  
120 understanding of the mechanisms behind calcium enrichment in SSAs.

### 121 122 3. Single-particle analysis:

123  
124 The abstract suggests that the controlling factors of the Ca enhancement which are still unknown are  
125 studied in this manuscript.

126 It is not clear to me what the results of the manuscript mean for the controlling factors.

127 Author's Response: We apologize for this misleading. Here “control” may not be appropriate. We  
128 would like to express that calcium enrichment in SSAs could be affected by a series of  
129 environmental factors. Our results indicated that the enhanced  $\text{Ca}^{2+}$  enrichment in SSAs was  
130 sensitive to the lower temperature, lower wind speeds, and the presence of sea ice. To avoid the  
131 potential ambiguities, we have rephrased the abstract as follows:

132 **Abstract:** Although calcium is known to be enriched in sea spray aerosols (SSAs), the factors that  
133 affect its enrichment remain ambiguous. In this study, we examine how environmental factors affect  
134 the distribution of water-soluble calcium ( $\text{Ca}^{2+}$ ) distribution in SSAs. We obtained our dataset from  
135 observations taken during a research cruise on the R/V *Xuelong* cruise in the Ross Sea, Antarctica,  
136 from December 2017 to February 2018. Our observations showed that the enrichment of  $\text{Ca}^{2+}$  in  
137 aerosol samples was enhanced under specific conditions, including lower temperatures ( $< -3.5\text{ }^\circ\text{C}$ ),  
138 lower wind speeds ( $< 7\text{ m s}^{-1}$ ), and the presence of sea ice. Our analysis of individual particle mass  
139 spectra revealed that a significant portion of calcium in SSAs was likely bound with organic matter  
140 (in the form of a single-particle type, OC-Ca). Our findings suggest that current estimations of  $\text{Ca}^{2+}$   
141 enrichment based solely on water-soluble  $\text{Ca}^{2+}$  may be inaccurate. Our study is the first to observe  
142 a single-particle type dominated by calcium in the Antarctic atmosphere. Our findings suggest that  
143 future Antarctic atmospheric modeling should take into account the environmental behavior of  
144 individual OC-Ca. With the ongoing global warming and retreat of sea ice, it is essential to  
145 understand the mechanisms of calcium enrichment and the mixing state of individual particles to  
146 better comprehend the interactions between aerosols, clouds, and climate during the Antarctica  
147 summer.

148  
149 A calcium-dominated OC-Ca particle type is detected. This particle type dominates the Ca-  
150 containing particle types, but it is not clear if these particles really represent microgels. The process  
151 how the biological organic material and the calcium end up in the same particle can not be identified  
152 from SPMS data alone.

153 Author's Response: We agree with the reviewer's comments regarding the limitations of the SPMS  
154 dataset to demonstrate that the particle type of OC-Ca represents microgels.

155 Based on the specific mixing state of OC-Ca, we infer that the OC-Ca might be marine  
156 microgels. As previously reported, on the one hand,  $\text{Ca}^{2+}$  tends to bind with organic matter of

157 biogenic origin, such as exopolymer substances (EPSs), and subsequently assemble as marine  
158 microgels (Verdugo et al., 2004; Gaston et al., 2011; Krembs et al., 2011; Orellana et al., 2011;  
159 Verdugo, 2012; Orellana et al., 2021). On the other hand, Leck, Bigg, and their colleagues have  
160 reported the presence of microgels in the cloud samples in the polar region (Leck and Bigg, 2005a,  
161 b; Bigg and Leck, 2008; Leck and Bigg, 2010; Leck et al., 2013; Kirpes et al., 2019). We cannot  
162 accurately identify whether the OC-Ca is microgels. We have clarified it in section 4 to better  
163 highlight this limitation. Please refer to lines 630-633.

164 Notably, the dataset via SPAMS cannot directly identify marine microgels. OC-Ca was likely  
165 associated with marine microgels, as calcium and biological organic material were extensively  
166 internally mixed. This OC-Ca type has previously been observed in the laboratory simulation of  
167 Collins et al. (2014).

168

169 4. Particle size range:

170

171 The difference in the size range of the two techniques is only discussed in the supplement. This is an  
172 important point when it comes to comparing the results of the two techniques. I suggest to move  
173 this part (supplement lines 123 - 141) into the main text (see comments above).

174 Author's Response: Thanks for the reviewer's constructive suggestion. We have incorporated lines  
175 123 to 141 of Text S3 into the ending of Section 4 Discussion. Please refer to lines 492-501 in the  
176 revised manuscript.

177

178

179 Furthermore, it is not only the size range, but also a comparison between number fractions or peak  
180 intensities (SPMS) and mass concentrations (IGAC). This should also be discussed.

181 Author's Response: Many thanks for the reviewer's constructive suggestion. We conducted a  
182 comparison analysis between particle count, peak area, and mass concentration, as shown in Table  
183 1. The discussion of this part was also incorporated into Section 4, such as lines 402-404, 414-422,  
184 423-427, etc. Meanwhile, we have moved Table S5 to the main text as Table 1.

185

186

187

188 The OC-CA particle size distribution as displayed (Fig 3 i) centers around 1  $\mu\text{m}$ , but this may be an  
189 instrumental effect (transmission and detection efficiency of the SPAMS). A plot of particle number  
190 fractions per size bin versus particle size will better show the contribution of each particle type.

191 Author's Response: Thanks for the reviewer's constructive suggestion. As mentioned by the  
192 reviewer, the particle size distribution may be affected by the transmission efficiency of the SPMS.  
193 We have added a subplot of particle number fractions per size bin versus particle size into Fig. 3 (j),  
194 as follows:

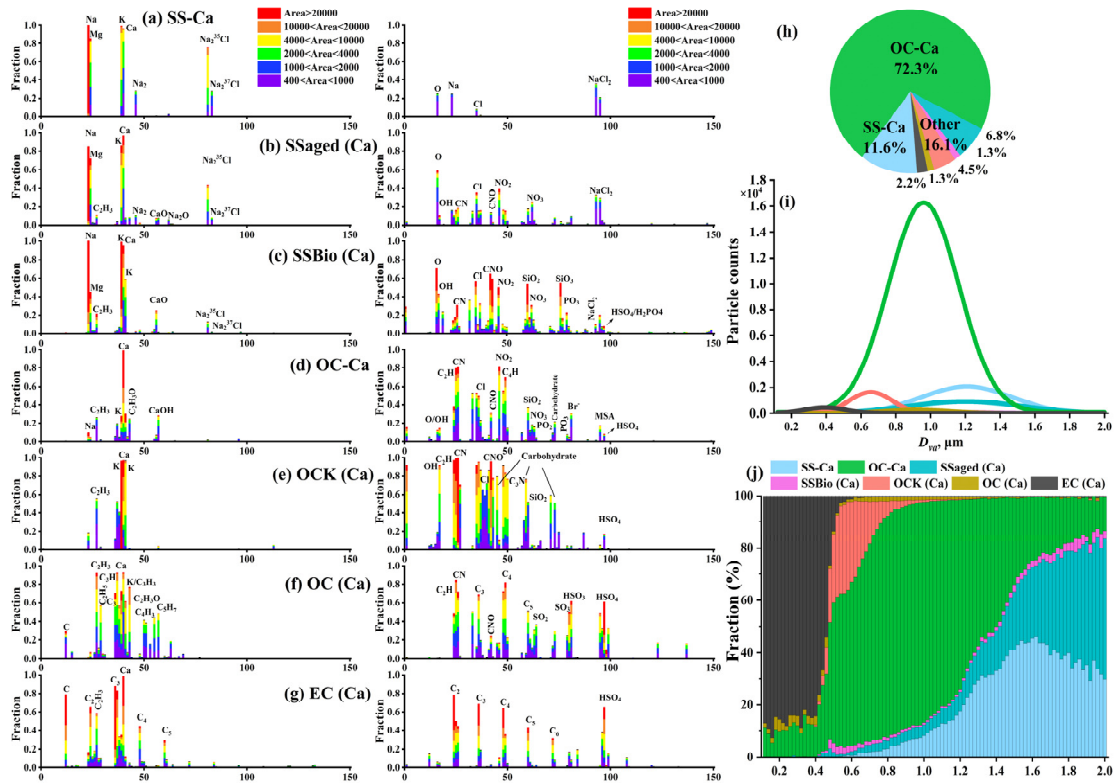

195

196

Figure 6

197

(a) – (g) Average digitized single-particle mass spectra of seven chemical classes of Ca-containing particles. New single-particle types are reclassified with  $m/z$  40 [ $\text{Ca}^{2+}$ ] based on previous ART-2a results. (h) Relative proportion and (i) unscaled size-resolved number distributions of single-particle types using Gaussian Fitting. (j) Number fractions of single-particle types per size bin versus particle size.

200

201

202

5. Trajectories:

203

204

205

More trajectories are needed. Either finer time steps (one trajectory per hour) or the "ensemble mode" of HYSPLIT, where many trajectories are calculated per start time with slight differences in the starting conditions. Only through such ensembles one can see the variations between individual trajectories and can judge the reliability of the backward calculation.

206

207

Author's Response: Many thanks for the reviewer's constructive suggestion. As suggested, we conducted a 96-hour back trajectory analysis, which includes one trajectory per hour in each starting condition. This analysis covered the selected enhanced calcium enrichment events (Area 1-5) and incorporated surface types such as sea ice, open water, Antarctic land, and chlorophyll-a concentration. Our results indicated that air masses traveling over the ice upon Ross Sea (marginal ice floe/sea ice) and/or Antarctic land were highly associated with enhanced calcium enrichment events. Moreover, the analysis indicated that the long-range transport of dust and open water are unlikely responsible for the observed calcium enrichment in SSAs. The discussion of this analysis

210

211

212

213

214

215

216



217 has been incorporated into section 3.1 of the main text. We have also supplemented a new plot,  
 218 Figure 5, to illustrate the results of the 96-hour back trajectory analysis.

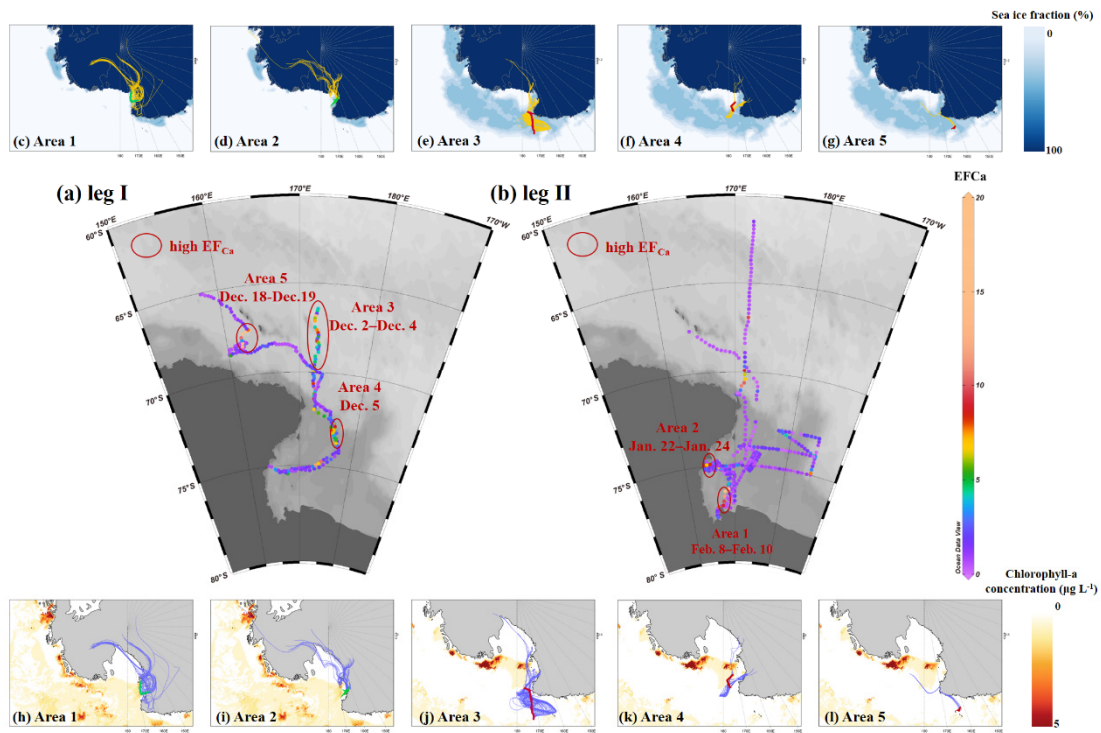

219  
 220 **Figure 5**  
 221 Distribution of EFCa during the (a) leg I and (b) leg II. Five distinct areas with continuous enhanced  
 222  $\text{Ca}^{2+}$  enrichment events, along with 96-hour back trajectories (one trajectory per hour in each  
 223 starting condition), sea ice fraction (c-g, yellow traces), and chlorophyll-a concentration (h-l, light-  
 224 blue traces). Lines in red and green referred to ship tracks for corresponding areas during the leg I  
 225 and leg II, respectively.

226  
 227 Specific points

228  
 229 Section 3.2

230  
 231 (1) What do you mean by "were further refined with an ion signal of  $m/z$  40  $[\text{Ca}]^+$ ."? Was there any  
 232 threshold applied to the intensity of  $m/z$  40 or were all mass spectra selected that had a signal  $> 0$  at  
 233  $m/z$  40? Please explain.  $>0$

234  
 235 Maybe this should be explained already in section 2.3.2 (lines 160-170)?  
 236 Author's Response: We apologize for any confusion. In the data analysis of SPAMS, we first  
 237 applied the ART-2a algorithm to cluster the obtained particles into seven groups. We then  
 238 reclassified the clustered groups by setting a threshold for  $m/z$  40  $[\text{Ca}]^+$  signal ( $> 0$ ) to obtain  
 239 individual calcareous particles. This means that all particles that were reclassified contained signals  
 240 of  $m/z$  40  $[\text{Ca}]^+$ . We hope this clears up any misunderstandings and have revised the relevant

241 sentences as follows.

242 To elucidate the mixing state of individual calcareous particles, we set a threshold of  $m/z$  40  $[Ca]^+$   
243 to reclassify all single-particle types that were obtained from the ART-2a algorithm. This means that  
244 all reclassified particles contain signals of  $m/z$  40  $[Ca]^+$ .

245

246 (2) Figure 3:

247

248 i) the size distributions look like Gauss fits. Please confirm if they are. I suggest using log scales for  
249 both axes. For the diameter axis, this is very common in aerosol science, and for the y-axis it will  
250 make particle types with low concentrations better visible. On a log scale, the Gauss fits should be  
251 replaced by lognormal fits.

252 Author's Response: Thanks for the reviewer's constructive suggestion. We agree with the  
253 reviewer's comment that using a double logarithmic axis is common in aerosol science. However,  
254 redrawing the plot using this axis format may not be suitable or visually effective. Therefore, we  
255 have followed the above suggestion and created a plot of particle number fractions per size bin  
256 versus particle size. We used Gaussian fitting to analyze the size distribution, which we have  
257 confirmed in the figure caption.

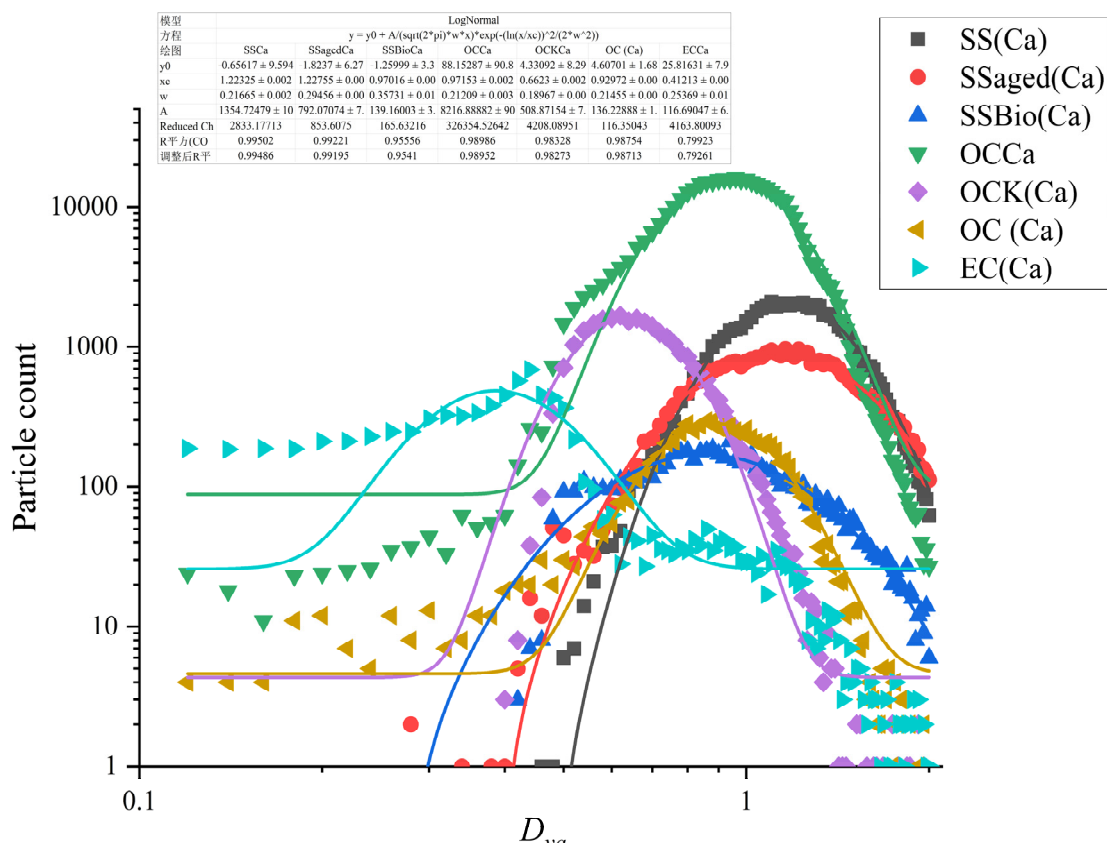

258

259 A plot of size distributions using a double logarithmic axis.

260

261



262 Minor points

263

264 (3) Title: remove the "through", e.g.:

265 Enrichment of calcium in sea spray aerosol: Bulk measurements and individual particle analysis  
266 during the R/V Xuelong cruise over the Ross Sea, Antarctica

267 [Author's Response: Thanks for the reviewer's comment. We have revised it accordingly.](#)

268

269 (4) Heading of section 2.2:

270

271 Meteorological

272 [Author's Response: Thanks for the reviewer's comment. We have revised it accordingly.](#)

273

## 274 **References**

275 Bigg, E. K. and Leck, C.: The composition of fragments of bubbles bursting at the ocean surface, *Journal*  
276 *of Geophysical Research: Atmospheres*, 113<https://doi.org/10.1029/2007jd009078>, 2008.

277 Collins, D. B., Zhao, D. F., Ruppel, M. J., Laskina, O., Grandquist, J. R., Modini, R. L., Stokes, M. D.,  
278 Russell, L. M., Bertram, T. H., Grassian, V. H., Deane, G. B., and Prather, K. A.: Direct aerosol  
279 chemical composition measurements to evaluate the physicochemical differences between  
280 controlled sea spray aerosol generation schemes, *Atmos. Meas. Tech.*, 7, 3667-3683,  
281 <https://doi.org/10.5194/amt-7-3667-2014>, 2014.

282 Gaston, C. J., Furutani, H., Guazzotti, S. A., Coffee, K. R., Bates, T. S., Quinn, P. K., Aluwihare, L. I.,  
283 Mitchell, B. G., and Prather, K. A.: Unique ocean-derived particles serve as a proxy for changes  
284 in ocean chemistry, *Journal of Geophysical Research: Atmospheres*,  
285 116<https://doi.org/10.1029/2010jd015289>, 2011.

286 Kirpes, R. M., Bonanno, D., May, N. W., Fraund, M., Barget, A. J., Moffet, R. C., Ault, A. P., and Pratt,  
287 K. A.: Wintertime Arctic Sea Spray Aerosol Composition Controlled by Sea Ice Lead  
288 Microbiology, *Acs Central Sci*, 5, 1760-1767, <https://doi.org/10.1021/acscentsci.9b00541>, 2019.

289 Krembs, C., Eicken, H., and Deming, J. W.: Exopolymer alteration of physical properties of sea ice and  
290 implications for ice habitability and biogeochemistry in a warmer Arctic, *P Natl Acad Sci USA*,  
291 108, 3653-3658, <https://doi.org/10.1073/pnas.1100701108>, 2011.

292 Leck, C. and Bigg, E. K.: Biogenic particles in the surface microlayer and overlaying atmosphere in the  
293 central Arctic Ocean during summer, *Tellus B*, 57, 305-316, <https://doi.org/10.1111/j.1600-0889.2005.00148.x>, 2005a.

295 Leck, C. and Bigg, E. K.: Source and evolution of the marine aerosol - A new perspective, *Geophys Res*  
296 *Lett*, 32<https://doi.org/10.1029/2005gl023651>, 2005b.

297 Leck, C. and Bigg, E. K.: New Particle Formation of Marine Biological Origin, *Aerosol Sci Tech*, 44,  
298 570-577, <https://doi.org/10.1080/02786826.2010.481222>, 2010.

299 Leck, C., Gao, Q., Mashayekhy Rad, F., and Nilsson, U.: Size-resolved atmospheric particulate  
300 polysaccharides in the high summer Arctic, *Atmos Chem Phys*, 13, 12573-12588,  
301 <https://doi.org/10.5194/acp-13-12573-2013>, 2013.

302 Orellana, M. V., Hansell, D. A., Matrai, P. A., and Leck, C.: Marine Polymer-Gels' Relevance in the  
303 Atmosphere as Aerosols and CCN, *Gels*, 7<https://doi.org/10.3390/gels7040185>, 2021.

304 Orellana, M. V., Matrai, P. A., Leck, C., Rauschenberg, C. D., Lee, A. M., and Coz, E.: Marine microgels  
305 as a source of cloud condensation nuclei in the high Arctic, P Natl Acad Sci USA, 108, 13612-  
306 13617, <https://doi.org/10.1073/pnas.1102457108>, 2011.

307 Verdugo, P.: Marine microgels, Annual Review of Marine Science, 4, 375-400,  
308 <https://doi.org/10.1146/annurev-marine-120709-142759>, 2012.

309 Verdugo, P., Alldredge, A. L., Azam, F., Kirchman, D. L., Passow, U., and Santschi, P. H.: The oceanic  
310 gel phase: a bridge in the DOM-POM continuum, Mar Chem, 92, 67-85,  
311 <https://doi.org/10.1016/j.marchem.2004.06.017>, 2004.

312
